# Supplementary material
Source: PubMed Central journal article supplement (PMC5384634)

## ONLINE-ONLY DATA SUPPLEMENT

### **Age-specific incidence, outcome, cost and projected future burden of atrial fibrillation-related embolic vascular events: a population-based study**

Gabriel S.C. Yiin DPhil, Dominic P.J. Howard DPhil, Nicola L.M. Paul DPhil, Linxin Li DPhil, Ramon Luengo-Fernandez DPhil, Linda M. Bull RGN, Sarah J.V. Welch RGN, Sergei A. Gutnikov DPhil, Ziyah Mehta DPhil, Peter M. Rothwell FMedSci on behalf of the Oxford Vascular Study

#### **Methods**

##### **OCSP and OXVASC Methodology**

The OXVASC and OCSP primary care practices had the same hospital referral patterns, held accurate age-sex registers of their patients, and were willing to refer any patient with a suspected cerebrovascular event to the study and allow regular searches of their computerized diagnostic coding systems. In both studies, the population was 94% white.<sup>1</sup>

**Definitions and diagnosis:** Diagnosis was designed to be as similar as possible in OXVASC to OCSP. The same definitions of stroke and TIA were used.<sup>2</sup> However, since clinical opinion about which clinical syndromes represent TIA or stroke has evolved over the last 25 years, the Principal Investigator of the OCSP had input into the design of OXVASC and reviewed a subset of cases to ensure that the application of definitions of events was comparable. Diagnosis was based on clinical findings and CT brain imaging as in OCSP. In addition, all CT scans were reviewed by a study neuroradiologist who was also involved in the OCSP and used the same criteria for haemorrhagic infarction and primary intracerebral haemorrhage as in the OCSP.

All events were categorized as first-ever incident or recurrent – based on clinical history rather than findings on brain imaging. As in the OCSP, a first-ever stroke that occurred in a patient with a previous TIA was coded as incident, but a first-ever TIA in a patient with a previous stroke was coded as recurrent.<sup>3</sup> The other OCSP requirements for definition of an “incident” TIA were also adhered to.<sup>3</sup> As in the OCSP, patients who had an event whilst temporarily away from Oxford were included, but visitors to Oxford who were not registered with one of the study family physicians were excluded.

**Case Ascertainment:** The following sources of ascertainment were used in OXVASC and OCSP:

- 1) Collaborating primary care physicians reported cases to the study physicians by telephone, fax or pager as soon as they became aware of a possible TIA or stroke. Patients not requiring immediate hospital admission were seen in a daily clinic, or at home if transfer to hospital was not inappropriate.
- 2) The study team maintained frequent personal contact with the general practices by regular visits, a quarterly newsletter, and via a liaison family physician in each practice.
- 3) Computerized hospital diagnostic codes were reviewed regularly. In OCSP, the Oxford Record Linkage system<sup>4</sup> was used. In OXVASC, the coding department for the Oxford Hospitals Trust provided a monthly GP-practice specific list of all patients with ICD-10 codes for TIA and stroke and all deaths in hospital. A similar list was obtained from the Oxford Eye Hospital and local community hospitals.
- 4) Hospital admission and Emergency Department registers were reviewed daily.

5) Out of hospital deaths were identified via the Coroner's Office, by review of all death certificates in the study practices, and by ICD-10 vascular death codes from the local Department of Public Health.

Several methods of case-ascertainment that were not used in OCSP were employed in OXVASC:

- 1) Daily visits to the Acute Medical Admissions Unit, Acute Stroke Unit, Neurology wards and Stroke Rehabilitation wards, and daily contact with Hospital Bereavement Officers to identify all patients brought into hospital dead or who died soon after arrival.
- 2) A computer-generated list of all requests for brain and cerebral vascular imaging was reviewed on a monthly basis and all referrals for carotid Doppler ultrasound were reviewed on a weekly basis.
- 3) Patients with visual symptoms were referred directly to the study from the Eye Emergency Unit and Department of Ophthalmology and lead clinical staffs in the other departments (e.g. paediatrics, obstetrics etc) were contacted monthly to ascertain strokes in patients under their care.

**Clinical assessment and investigation:** A study clinician assessed patients as soon as possible after the event in hospital, in a daily dedicated clinic or at home. Informed consent was sought, where possible, or assent was obtained from a relative. A standard clinical history and examination were performed. As in the OCSP, pre-morbid handicap and disability was assessed with the Rankin<sup>5</sup> score. If a patient died prior to assessment, an eyewitness account of the clinical event and reviewed any relevant records were obtained. Event and baseline characteristics were recorded and all patients underwent standardized investigations including blood screen, 12-lead electrocardiogram, brain imaging (CT and/or MRI) and vascular imaging (carotid/peripheral duplex ultrasonography or CT/MR angiography). The treating physicians completed supplementary investigations such as echocardiography when indicated.

If death occurred outside hospital or prior to brain imaging, the autopsy result was reviewed. Given the high rate (98%) of imaging/autopsy in OXVASC, strokes of unknown type were coded as ischaemic for the purpose of analysis. In OCSP, strokes that did not have brain imaging or autopsy (12%) were classified as haemorrhages only if clinical scoring systems indicated a high degree of certainty.<sup>6</sup> Otherwise they are coded as ischaemic for the purpose of this analysis. Diagnosis of subarachnoid haemorrhage<sup>6</sup> and clinical subtyping of stroke<sup>7</sup> were the same as in OCSP.

Both OCSP and OXVASC recorded pre-morbid medication and vascular risk factors from the patient or relative, hospital records and primary care records. The most recent measurement of blood pressure was recorded in both studies from the general practice records. Total cholesterol concentration was measured at the time of assessment after the TIA or stroke. All surviving cases were followed-up by a research nurse or therapist at 1, 6, 12, 24, 60 and 120 months from the time of the stroke and the modified Rankin score was determined. If a recurrent vascular event was suspected, the patient was assessed by a study physician.

1. 2001 census area statistics. London: Stationery Office, 2001
2. Hatano S. Experience from a multicentre stroke register: a preliminary report. *Bull World Health Organ.* 1976;54:541-53.
3. Dennis MS, Bamford JM, Sandercock PA, Warlow CP. Incidence of transient ischemic attacks in Oxfordshire, England. *Stroke.* 1989;20:333-9.
4. Acheson ED. *Medical record linkage.* London: OUP, 1967.
5. van Swieten JC, Koudstaal PJ, Visser MC, Schouten HJ, van Gijn J. Interobserver agreement for the assessment of handicap in stroke patients. *Stroke.* 1988;19:604-7.
6. Bamford J, Sandercock P, Dennis M, Burn J, Warlow C. A prospective study of acute cerebrovascular disease in the community: the Oxfordshire Community Stroke Project--1981-86. 2.

Incidence, case fatality rates and overall outcome at one year of cerebral infarction, primary intracerebral and subarachnoid haemorrhage. *Journal of neurology, neurosurgery, and psychiatry*. 1990;53:16-22.

7. Bamford J, Sandercock P, Dennis M, Burn J, Warlow C. Classification and natural history of clinically identifiable subtypes of cerebral infarction. *Lancet*. 1991;337:1521-6.

### **Extended methods for ascertainment of systemic emboli in OXVASC**

Ascertainment of patients with acute systemic (non-cerebral) embolic events was done using overlapping methods of hot and cold pursuit similar to those used for acute cerebral events. Hot pursuit was based on: 1) Daily searches of Emergency Department admission and symptom/diagnosis registers; 2) Daily listing from the central admissions department of all patients from our general practices admitted to hospital, and assessment of these patients in hospital; 3) Daily visits to the cardiac surgery and vascular surgery wards and review of daily lists of all patients referred to vascular surgery or for peripheral angiography; 4) Daily identification via Bereavement Officers of patients dead on arrival at hospital or who died soon after; 5) Daily assessment of all patients undergoing diagnostic angiographic, angioplasty/stenting or peripheral arterial surgical procedures in any territory.

The methods of cold pursuit were: 1) Weekly review of all listed surgical procedures undertaken by vascular and cardiovascular surgery; 2) Frequent contact with general practices and monthly searches of computerized practice diagnostic codes; 3) Monthly practice-specific list of all patients with relevant diagnostic codes from the coding departments covering all acute and community hospitals; 4) Monthly visits to the Coroner's Office to review out-of-hospital deaths; 5) Review of all death certificates and relevant clinical details in the study general practices; 6) Practice-specific listings of all ICD-10 death codes from the local Department of Public Health; 7) Review of vascular surgery outpatient clinic letters to identify all patients attending vascular clinics who were not admitted to hospital.

A study clinician assessed patients as soon as possible after the event. Informed consent was sought, where possible, or assent was obtained from a relative. Standardized clinical history and cardiovascular examination were recorded. We also recorded from the patient, their hospital records and their primary care records, details of the clinical event, medication, past medical history, all investigations relevant to their admission and all interventions subsequent to the event. Vascular assessment included clinical examination and measurement of the abdominal and peripheral pulses, Buerger's test and ankle Doppler pressure recordings. For cases in which clinical vascular assessment was not possible by the study clinician prior to urgent revascularisation or death, we used assessments made by the admitting clinician.

If a patient died prior to assessment, we obtained eyewitness accounts and reviewed any relevant records. If death occurred outside hospital or prior to investigation, the autopsy result was reviewed. Clinical details were sought from primary care physicians or other clinicians on all deaths of possible vascular aetiology. Initial clinical assessments were made by study clinical research fellows alongside the clinical teams. All diagnoses were subsequently reviewed by a vascular surgeon.

Acute peripheral arterial events were defined as any acute vascular event in any part of the arterial system that affected the aorta and its major branches, a limb or an organ other than the heart or the brain/eye and led to hospital admission or caused death in the community. All patients were followed-up by a research nurse or via their family doctor, with recurrent events also identified by the on-going study surveillance. If a recurrent vascular event was suspected, the patient was assessed by a study physician. All events were categorized as first-ever incident or recurrent and specific to territory. An incident acute systemic embolic event implied the first ever acute embolic arterial event in any vascular territory apart from the brain. Only incident events were included in the analysis for this manuscript. Patients who had an event whilst temporarily away from Oxfordshire were included, but visitors to Oxfordshire who were not registered with one of the study practices were excluded.

### **Recording and coding of deaths in the OXVASC population**

Out of hospital death accounts for a small proportion of ischaemic strokes and systemic emboli, but in view of previous data on the inaccuracy of death certification of vascular disease<sup>1-2</sup>, all deaths in the OXVASC population were recorded and coded as follows:

*i. All certified deaths due to vascular disease:* All deaths with the underlying cause coded for the purposes of national statistics as being due to “ischaemic heart disease” (ICD I210-I229, I251, I259), “cerebrovascular disease” (ICD I600-I619, I630-I669, I670, I678, I679, I694, I698), “peripheral vascular disease” (ICD I700, I710-I729, I739-I749, I790), or “visceral vascular disease” (ICD D735, K763, N280, K550, K551, K558, K559).

*ii. All certified acute vascular deaths:* All deaths where the underlying cause of death was coded for the purposes of national statistics as being due to “acute ischaemic heart disease” (ICD I210-I229), “acute cerebrovascular disease” (ICD I600-I619, I630-I669), “acute peripheral vascular disease” (ICD I710, I711, I713, I715, I718, I720-I729, I739-I749, I790), or “acute visceral vascular disease” (ICD D735, K763, N280, K550, K558, K559).

*iii. Probable or definite acute vascular deaths:* All deaths in (ii) excluding unclassifiable sudden deaths (as defined below) and other deaths that after evaluation of the clinical and/or post-mortem data were considered to have been incorrectly attributed (i.e. there was definite evidence of another cause), and with the addition of any deaths not in (ii) that were considered by the OXVASC researchers to have been due to an acute vascular event.

*iv. Possible acute vascular deaths:* All deaths in (iii) excluding sudden deaths for which the only supporting evidence was a previous history of symptomatic vascular disease in the relevant arterial territory (unless there was a documented acute myocardial infarction, acute stroke or acute peripheral arterial event within the previous 30 days).

Unclassifiable deaths, which were mainly out-of-hospital deaths, were certified as having a vascular cause, but had no witness description of the event or of preceding symptoms to suggest acute vascular disease in a specific territory, no post-mortem evidence of an acute vascular event or other cause of death, no post-mortem evidence of clinically significant coronary atherosclerosis, and no past history of symptomatic vascular disease in a relevant arterial territory.

1. Coull AJ, Silver LE, Bull LM, Giles MF, Rothwell PM. Direct assessment of completeness of ascertainment in a stroke incidence study. *Stroke*. 2004;35:2041-5.
2. Luepker RV, Apple FS, Christenson RH, Crow RS, Fortmann SP, Goff D, Goldberg RJ, Hand MM, Jaffe AS, Julian DG, Levy D, Manolio T, Mendis S, Mensah G, Pajak A, Prineas RJ, Reddy KS, Roger VL, Rosamond WD, Shahar E, Sharrett AR, Sorlie P, Tunstall-Pedoe H. Case definitions for acute coronary heart disease in epidemiology and clinical research studies: a statement from the AHA Council on Epidemiology and Prevention; AHA Statistics Committee; World Heart Federation Council on Epidemiology and Prevention; the European Society of Cardiology Working Group on Epidemiology and Prevention; Centers for Disease Control and Prevention; and the National Heart, Lung, and Blood Institute. *Circulation*. 2003;108:2543-9.

## Appendix I

### Additional details on under-treatment of patients with incident embolic event and known prior AF in relation to risk scores and outcomes in OXVASC

Of the 280 patients with incident embolic event and not anticoagulated, 217 (77.5%) had a CHADS<sub>2</sub> score  $\geq 2$  (Table 3, Tables IX-XI), of whom 51 (23.5%) had a documented absolute or relative contraindication (Table XII) and 181 (83.4%) had a HAS-BLED score  $< 3$  (Table XI). 194 (57.7%) were on antiplatelet drugs, but 86 (25.6%) were on no antithrombotic (Table 3, Figure I). In patients with ischaemic stroke, anticoagulation was associated with reduced severity (NIHSS: anticoagulated =  $5.5 \pm 5.7$ ; antiplatelet/none =  $8.3 \pm 7.5$ ,  $p=0.006$ ).

Rates of premorbid anticoagulation for known prior AF in patients with AF-related ischaemic events were highest at younger ages (Table 3), falling to 12.9% (19/147) at 80-89 and 0% (0/61) at  $\geq 90$ . Prior anticoagulation was less frequent in women than in men (23/186 vs 33/150,  $p=0.02$ ), but this was due to the over-representation of women in older age groups. Of the 208 patients aged  $\geq 80$ , 189 (90.9%) were not anticoagulated. Of these 189, 167 (88.4%) had a premorbid CHADS<sub>2</sub> score  $\geq 2$ , 139 (83.2%) had a HAS-BLED score  $< 3$  (Table XI), and only 10 (5.3%) had previously had a trial of anticoagulation and had discontinued treatment (Table XIII). Of the 167 with a CHADS<sub>2</sub> score  $\geq 2$ , only 43 (25.7%) had any documented relative or absolute contraindication (Table XII).

Of the 189 patients who were aged  $\geq 80$  and not anticoagulated (Table XIVA-B), 166 (87.8%) had no major disability (i.e. were still independently mobile - mRS $\leq 3$ ) prior to the event and 99 (52.4%) were previously completely independent (mRS $\leq 2$ ). Of the 167 (88.4%) who had an embolism risk score favouring treatment (CHADS<sub>2</sub> score  $\geq 2$ ), 125 (74.9%) were dead or institutionalized after the event. Indeed, of all disabling or fatal events at age  $\geq 80$  in the study population, 230/449 (51.2%) were AF-related and 181 (40.3%) occurred in patients with known prior AF. Of 136 patients aged  $\geq 80$  with known prior AF and CHADS<sub>2</sub>  $\geq 2$  who had an incident event resulting in death or institutionalization at six months follow-up, only 11 (8.1%) were anticoagulated prior to the event (Figures IIA-F).

## Table and Figure legends

| Table | title                                                                                                                                                                                                | Page |
|-------|------------------------------------------------------------------------------------------------------------------------------------------------------------------------------------------------------|------|
| IA    | Anticoagulation rate by age (UK studies)                                                                                                                                                             | 3    |
| IB    | Anticoagulation rate by age (other countries)                                                                                                                                                        | 4    |
| IB    | Anticoagulation rate by age and risk scores in the UK                                                                                                                                                | 6    |
| II    | Distribution of AF/flutter types with timing of incident ischaemic stroke presentation in OXVASC                                                                                                     | 8    |
| III   | The Oxford and TOAST-classification of AF-related ischaemic strokes in OXVASC                                                                                                                        | 9    |
| IV    | Age-specific rate per 1000 population per year of incident AF-related ischaemic stroke in OCSP and OXVASC                                                                                            | 10   |
| V     | Proportion of patients with incident ischaemic stroke and paroxysmal AF according to age <80 or ≥80                                                                                                  | 11   |
| VI    | Proportion of patients with non-disabling (1-month mRS <3) incident ischaemic stroke with any AF type or paroxysmal AF according to age <80 or ≥80                                                   | 12   |
| VIIA  | Baseline characteristics of patients with incident ischaemic stroke and known premorbid AF                                                                                                           | 13   |
| VII B | Baseline characteristics, medication use, outcome and case fatality in AF-related incident systemic emboli in OXVASC                                                                                 | 14   |
| VII C | Patients with incident ischaemic stroke at age ≥80 and any AF in OCSP versus OXVASC                                                                                                                  | 15   |
| VII D | Patients with ischaemic stroke at aged ≥80 and known prior AF in OCSP versus OXVASC                                                                                                                  | 16   |
| VIII  | Comparison of functional outcome and case fatality at 1-month and 6-month follow up in first-ever ischaemic stroke with any and premorbid AF in OXVASC and OCSP                                      | 17   |
| IX    | Relationship between premorbid antithrombotic therapy, pre-morbid risk scores and age in patients with incident ischaemic stroke and systemic embolism with known prior AF in OXVASC                 | 18   |
| XA    | Premorbid warfarin use according to premorbid CHADS <sub>2</sub> , CHA <sub>2</sub> DS <sub>2</sub> VASc and HAS-BLED scores in patients with incident ischaemic stroke and known prior AF in OXVASC | 19   |
| XB    | Premorbid warfarin use according to premorbid CHADS <sub>2</sub> , CHA <sub>2</sub> DS <sub>2</sub> VASc and HAS-BLED scores in OXVASC patients with systemic embolism and known prior AF in OXVASC  | 20   |
| XI    | Comparison of premorbid CHADS <sub>2</sub> and HAS-BLED scores in patients at all ages and at age ≥80 years with incident embolic event and known prior AF but not on anticoagulation in OXVASC      | 21   |
| XII   | Reasons for no premorbid warfarin use in patients at all ages and at age ≥80 years with incident embolic events, known prior AF and CHADS <sub>2</sub> score ≥2 in OXVASC                            | 23   |
| XIII  | Reasons for stopping previous warfarin at any point prior to an embolic event in OXVASC                                                                                                              | 24   |
| XIVA  | Changes in disability status (modified Ranking scale – mRS) in patients with an incident ischaemic stroke or systemic embolism and <u>any</u> AF but not on premorbid anticoagulants                 | 25   |
| XIV B | Changes in disability status (modified Ranking scale – mRS) in patients with an incident ischaemic stroke or systemic embolism and <u>known prior</u> AF but not on premorbid anticoagulants         | 26   |
| XVA   | Care costs for incident embolic vascular events in non-anticoagulated patients with known prior AF, extrapolated from OXVASC across the UK                                                           | 27   |

| <b>Table</b> | <b>title</b>                                                                                                                                                | <b>Page</b> |
|--------------|-------------------------------------------------------------------------------------------------------------------------------------------------------------|-------------|
| XVB          | Care costs for AF-related incident embolic vascular events extrapolated from OXVASC across the UK, projections for 2050                                     | 28          |
| XVIA         | UK population projections (in 1000s) by Office for National Statistics (UK) for 1981-86, 2010, 2030 and 2050 by mid-point 10-year age bands                 | 29          |
| XVIB         | UK population projections (in 1000s) by the Office for National Statistics (UK) for 2010, 2030 and 2050 by 5-year age bands                                 | 30          |
| XVIC         | Estimated number of patients with AF-related incident ischaemic stroke based on extrapolation of age/sex-specific rates in OCSP to UK population in 1981-86 | 31          |
| XVID         | Estimated number of patients with AF-related events based on extrapolation of age/sex-specific rates in OXVASC to UK population in 2010                     | 32          |
| XVIE         | Increment in age-specific incidence rates between OXVASC and OCSP over 25 years                                                                             | 33          |
| XVIF         | Estimated number of patients with AF-related events based on extrapolation of age/sex-specific rates in OXVASC to UK population in 2030                     | 34          |
| XVIG         | Estimated number of patients with incident AF-related events based on extrapolation of rates in OXVASC to UK population in 2050                             | 35          |
| XVII         | Quality and Outcomes framework guidance on AF management from 2006-2013                                                                                     | 36          |
| XVIII        | Mean institutional costs incurred by patients with ischaemic event and known prior AF according to pre-morbid anticoagulation in first 5 years of OXVASC    | 37          |
| XIX          | 6-month functional outcome in patients with ischaemic event and known prior AF according to pre-morbid anticoagulation in OXVASC                            | 38          |

| <b>Figure</b> | <b>title</b>                                                                                                                                                                            | <b>Page</b> |
|---------------|-----------------------------------------------------------------------------------------------------------------------------------------------------------------------------------------|-------------|
| I             | Premorbid antithrombotic therapy in the 336 OXVASC patients with incident AF-related ischaemic stroke or systemic embolism and known prior AF                                           | 39          |
| IIA           | Premorbid warfarin use in OXVASC patients at age $\geq 80$ with known prior AF who had a fatal/disabling embolic event or were institutionalized at 6 months follow-up                  | 40          |
| IIB           | Premorbid warfarin use in OXVASC patients with known prior AF who had a fatal/disabling embolic event or were institutionalized at 6 months follow-up                                   | 41          |
| IIC           | Premorbid warfarin use in OXVASC patients at age $\geq 80$ with known prior AF who had a fatal/disabling ischaemic stroke or were institutionalized at 6 months follow-up               | 42          |
| IID           | Premorbid warfarin use in OXVASC patients with known prior AF who had a fatal/disabling stroke or were institutionalized at 6 months follow-up                                          | 43          |
| IIE           | Premorbid warfarin use in OXVASC patients at age $\geq 80$ with known prior AF who had a fatal/disabling (6M mRS=3-6) systemic embolism or were institutionalized at 6 months follow-up | 44          |
| IIF           | Premorbid warfarin use in OXVASC patients with known prior AF who had a fatal/disabling (6M mRS=3-6) systemic embolism or were institutionalized at 6 months follow-up                  | 45          |
| III           | Premorbid antithrombotic agent use according to CHADS <sub>2</sub> score                                                                                                                | 46          |
| IV            | 5-year risk of institutionalization in a nursing or residential home care after AF-related incident stroke                                                                              | 47          |
| V             | Rates of prior anticoagulation in patients with incident stroke or ischaemic stroke and known prior AF in OXVASC and other recent stroke incidence studies                              | 48          |

**Table IA: Anticoagulation rate by age (UK studies)**

| Studies                                                                                                | Anticoagulation rate (%) by age                                               |
|--------------------------------------------------------------------------------------------------------|-------------------------------------------------------------------------------|
| Bromley Hospital NHS Trust, UK<br>(study period not specified) <sup>1</sup><br>Chronic AF only         | Age 75-89: 6.4%                                                               |
| Northumberland, UK <sup>2</sup><br>Study period not specified                                          | Age ≥75: 16.9%                                                                |
| General Practice Research<br>Database (GPRD), England &<br>Wales <sup>3</sup><br>Prevalence 1998: 1.2% | 1994 Age ≥75: 10.9%<br>Age ≥85: 4.5%<br>1998 Age ≥75: 21.2%<br>Age ≥85: 11.0% |
| ECHOES study, UK <sup>4</sup><br>Prevalence 1999: 2%                                                   | Age ≥75: 17.9%                                                                |
| Southwest Scotland <sup>5</sup><br>No prevalence given<br>27 practices, 1999                           | Age ≥75: 29.0%                                                                |
| South Wales <sup>6,7</sup><br>Prevalence 2000: 1.4%<br>(6,108/424,000)                                 | Age >75: 27.3%<br>Age >80: 20.8%                                              |
| DIN-Link database, UK <sup>8</sup><br>“Active” AF Prevalence<br>2003:1.2%<br>(12,353/1,003,372)        | Age ≥75: 44.2%<br>Age ≥85: 27.1%                                              |
| South London (2004), UK <sup>9</sup><br>Prevalence: 1.2%<br>(944/81,811)                               | Age ≥75: 35.5%<br>Age ≥85: 26.4%                                              |



**Table 1B: Anticoagulation rate by age (other countries)**

| Studies                                                                                                                               | Anticoagulation rate (%) by age                            |
|---------------------------------------------------------------------------------------------------------------------------------------|------------------------------------------------------------|
| Connecticut Hospitals, USA <sup>10</sup><br>(1994)                                                                                    | Age 75-84: 34%<br>Age ≥85: 23%                             |
| Long term care facilities, USA <sup>11</sup> (1993-5)                                                                                 | Age 75-84: 34.6%<br>Age ≥85: 53.1%                         |
| Cardiovascular Health Study, USA<br>(1995) <sup>12</sup>                                                                              | Age 80-89: 24.2%<br>Age ≥90: 15.4%                         |
| Missouri Medicare beneficiaries, USA<br>(1993-6) <sup>13</sup><br>Without contraindications*                                          | All AF patients<br>Age >75: 29%<br>Age >75: 41%*           |
| Kaiser Permanente North California <sup>14,15</sup><br>Prevalence 1996-97: 0.95%<br>(17,955/1,890,000); without<br>contraindications* | Age 75-84: 57.3%*<br>Age ≥85: 35.4%*                       |
| Åkersberga Community Health Centre,<br>Sweden <sup>16</sup><br>Prevalence (1992-8): 0.45%                                             | 1992-3<br>Age ≥75: 26.0%<br>1997-8<br>Age ≥75: 25.0%       |
| Italian teaching hospital (1999) <sup>17</sup><br>Prevalence:7.2%<br>Chronic AF only                                                  | Age ≥75: 11.3%                                             |
| National Ambulatory National Medical<br>Care survey, USA <sup>18</sup><br>Prevalence (1991-2000): 0.57%                               | 1991-1992<br>Age ≥80: 14.3%<br>1999-2000<br>Age ≥80: 47.5% |
| Stockholm South General Hospital<br>(2002), Sweden <sup>19</sup><br>*Warfarin in AF patients without<br>Contraindication              | Age ≥80: 30%<br>Age ≥80: 46%*                              |
| FALSTAF Study group, France (2002) <sup>20</sup><br>Permanent AF only                                                                 | Age ≥80: 63.5%                                             |

National Anticoagulation Benchmark  
and Outcomes Report (NABOR)  
program, USA (2002)<sup>21</sup>

Age  $\geq$ 80: 46%

Hospital study, USA (2001-2)<sup>22</sup>

Age 80-89: 45%

Age  $\geq$ 90: 24%

---

**Table 1C: Anticoagulation rate by age and risk scores in the UK**

| Studies                                                                                             | Anticoagulation rate (%) by CHADS <sub>2</sub> or CHA <sub>2</sub> DS <sub>2</sub> VASc $\geq 2$                             | Anticoagulation rate (%) by age                                  |
|-----------------------------------------------------------------------------------------------------|------------------------------------------------------------------------------------------------------------------------------|------------------------------------------------------------------|
| Oxfordshire, UK (unpublished)<br>Prevalence on 31/08/2012:<br>1.4%<br>(9,449/676,395)               | 58.3%<br>(31/03/2011-31/08/2012)                                                                                             | --                                                               |
| Continuous Recording Scheme,<br>Scotland <sup>23</sup><br>Prevalence 2002: 0.87%<br>(3,135/362,155) | 42%                                                                                                                          | Age $\geq 75$ : 37.1%<br>Age >85: 23.0%                          |
| GPRD, UK <sup>24</sup><br>No prevalence given<br>Unclear study period<br>Chronic AF only            | 22.6%                                                                                                                        | Age $\geq 75$ : 32.9%<br>Age $\geq 80$ : 25.0%<br>Age >85: 15.9% |
| GPRD, UK <sup>25</sup><br>No prevalence given<br>2000-9                                             | CHADS <sub>2</sub> $\geq 2$ + age $\geq 80$ : 33%<br>CHA <sub>2</sub> DS <sub>2</sub> VASc $\geq 2$ + age<br>$\geq 80$ : 32% | Age $\geq 80$ : 31.9%                                            |
| GRASP-AF, UK <sup>26</sup><br>Prevalence 2009-12: 1.76%<br>(231,833/13,100,000)                     | CHADS <sub>2</sub> $\geq 2$ + age $\geq 80$ : 47.4%                                                                          | Age $\geq 80$ : 46.0%                                            |

1. Perez I, Melbourn A, Kalra L. Use of antithrombotic measures for stroke prevention in atrial fibrillation. *Heart*. 1999;82:570-74
2. Sudlow M, Thomson R, Thwaites B, Rodgers H, Kenny R. Prevalence of atrial fibrillation and eligibility for anticoagulants in the community. *Lancet*. 1998;352:1167-71
3. Majeed A, Moser K, Carroll K. Trends in the prevalence and management of atrial fibrillation in general practice in England and Wales, 1994-1998: analysis of data from the General Practice Research Database. *Heart*. 2001;86:284-88
4. Davis RC, Hobbs FDR, Kenkre JE, Roalfe AK, Iles R, Lip GY, Davies MK. Prevalence of atrial fibrillation in the general population and in high-risk groups: the ECHOES study. *Europace*. 2012;14:1553-59
5. Burton C, Isles C, Norrie J, Hanson R, Grubb E. The safety and adequacy of antithrombotic therapy for atrial fibrillation: a regional cohort study. *Br J Gen Pract*. 2006;56:697-702
6. Jones M, McEwan P, Morgan CL, Peters JR, Goodfellow J, Currie CJ. Evaluation of the pattern of treatment, level of anticoagulation control, and outcome of treatment with warfarin in patients with non-valvular atrial fibrillation: a record linkage study in a large British population. *Heart*. 2005;91:472-77

7. Currie CJ, Jones M, Goodfellow J, McEwan P, Morgan CL, Emmas C, Peters JR. Evaluation of survival and ischaemic and thromboembolic event rates in patients with non-valvular atrial fibrillation when treated and untreated with warfarin. *Heart*. 2006;92:196-200
8. De Wilde S, Carey IM, Richards N, Cook DG. Trends in the prevalence of diagnosed atrial fibrillation, its treatment with anticoagulation and predictors of such treatment in UK primary care. *Heart*. 2006;92:1064-70
9. De Lusignan S, Van Vlymen J, Hague N, Thana L, Chan T, Dzregah B. Preventing stroke in people with atrial fibrillation: a cross sectional study. *J Public Health. (Oxf)* 2005;27:85-92
10. Brass LM, Krumholz HM, Scinto JM, Radford M. Warfarin use among patients with atrial fibrillation. *Stroke*. 1997;28:2382-9
11. Gurwitz JH, Monette J, Rochon PA, Eckler MA, Avorn J. Atrial fibrillation and stroke prevention with warfarin in the long term care setting. *Arch Int Med*. 1997;157:978-84
12. White R, McBurnie MA, Manolio T, Furberg CD, Gardin JM, Kittner SJ, Bovill E, Knepper L. Oral anticoagulation in patients with atrial fibrillation: adherence with guidelines in an elderly cohort. *Am J Med*. 1999;106:165-71
13. Gage BF, Boechler M, Doggette AL, Fortune G, Flaker GC, Rich WW, Radford MJ. Adverse outcomes and predictors of underuse of antithrombotic therapy in Medicare Beneficiaries with chronic atrial fibrillation. *Stroke*. 2000;31:822-27
14. Go AS, Hylek EM, Phillips KA, Chang Y, Henault LE, Selby JV, Singer DE. Prevalence of diagnosed atrial fibrillation in adults: National implications for rhythm management and stroke prevention: The AnTicoagulation and Risk Factors in Atrial Fibrillation (ATRIA) Study. *JAMA*. 2001;285:2370-75
15. Go AS, Hylek EM, Borowsky LH, Phillips KA, Selby JV, Singer DE. Warfarin use among ambulatory patients with non-valvular atrial fibrillation: the AnTicoagulation and risk factors in Atrial Fibrillation (ATRIA) Study. *Ann Int Med*. 1999;131:927-34
16. Wandell PE. Drug use in patients with atrial fibrillation in Swedish primary health care: a comparison 5 years apart. *Eur J Clin Pharmacol*. 1999;55:333-7
17. Ageno W, Ambrosini F, Nardo B, Imperiale D, Dentali F, Mera V, Cattaneo R, Barlocco E, Steidl L, Venco A. Atrial fibrillation and antithrombotic treatment in Italian hospitalized patients: a prospective, observational study. *J Thrombo Thrombolysis*. 2001;12:225-30
18. Fang MC, Stafford RS, Ruskin JN, Singer DE. National trends in antiarrhythmic and antithrombotic medication use in atrial fibrillation. *Arch Int Med*. 2004;164:55-60
19. Friberg L, Hammar N, Ringh M, Pettersson H, Rosenqvist M. Stroke prophylaxis in atrial fibrillation: who gets it and who does not? Report from the Stockholm Cohort-study on Atrial Fibrillation (SCAF-study). *Eur Heart J*. 2006;27:1954-64
20. FALSTAF Study Group, Leizorovicz A, Cohen A, Guenoun M, Mismetti P, Weisselinger N. Influence of age on the prescription of vitamin K antagonists in outpatients with permanent atrial fibrillation in France. *Pharmacoepidemiol Drug Saf*. 2007;16:32-8
21. Waldo AL, Becker RC, Tapson VF, Colgan KJ. Hospitalized patients with atrial fibrillation and a high risk of stroke are not being provided with adequate anticoagulation. *J Am Coll Cardiol*. 2005;46:1729-36
22. Hylek EM, D'Antonio J, Evans-Molina C, Shea C, Henault L, Regan S. Translating the results of randomized trials into clinical practice: the challenge of warfarin candidacy among hospitalized elderly patients with atrial fibrillation. *Stroke*. 2006;37:1075-80
23. Murphy NF, Simpson CR, Jhund PS, Stewart S, Kirkpatrick M, Chalmers J, MacIntyre K, McMurray JJ. A national survey of the prevalence, incidence, primary care burden and treatment of atrial fibrillation in Scotland. *Heart*. 2007;93:606-12
24. Rietbrock S, Plumb JM, Gallagher AM, van Staa TP. How effective are dose adjusted warfarin and aspirin for the prevention of stroke in patients with chronic atrial fibrillation? An analysis of the UK General Practice Research Database. *Thromb Haemost*. 2009;101:527-34
25. Scowcroft ACE, Lee S, Mant J. Thromboprophylaxis of elderly patients with AF in the UK: an analysis using the General Practice Research Database (GPRD) 2000-2009. *Heart*. 2013; 99(2):127-32.
26. Cowan C, Healcon R, Robson I, Long WR, Barrett J, Fay M, Tyndall K, Gale CP. The use of anticoagulants in the management of atrial fibrillation among general practices in England. *Heart*. 2013;99:1166-72.

**Table II: Distribution of AF/flutter types with timing of incident ischaemic stroke presentation in OXVASC**

|                      | <b>Paroxysmal (%)</b> | <b>Persistent* (%)</b> | <b>Permanent (%)</b> | <b>Total (%)</b> |
|----------------------|-----------------------|------------------------|----------------------|------------------|
| Premorbid            |                       |                        |                      |                  |
| <80 years            | 36 (32.4)             | 20 (17.5)              | 54 (34.2)            | 110 (28.7)       |
| ≥80 years            | 46 (41.4)             | 28 (24.5)              | 90 (57.0)            | 164 (42.8)       |
| Only at presentation | 12 (10.8)             | 53 (46.5)              | 10 (6.3)             | 75 (19.6)        |
| Within first month   | 17 (15.3)             | 13 (11.4)              | 4 (2.5)              | 34 (8.9)         |
| <b>Total</b>         | <b>111 (100)</b>      | <b>114 (100)</b>       | <b>158 (100)</b>     | <b>383 (100)</b> |

\*AF was defined as persistent rather than permanent if it had been present apparently continuously but for less than one year.

**Table III: The Oxford and TOAST-classification of AF-related incident ischaemic strokes in OXVASC**

**Oxford-classification**

| <b>Category</b>                      | <b>Number (%)</b> |
|--------------------------------------|-------------------|
| Total anterior circulation infarct   | 86 (22.5)         |
| Partial anterior circulation infarct | 158 (41.3)        |
| Lacunar infarct                      | 39 (10.2)         |
| Posterior circulation infarct        | 92 (24.0)         |
| Anterior and posterior circulation   | 4 (1.0)           |
| Uncertain                            | 4 (1.0)           |
| <b>Total</b>                         | <b>383 (100)</b>  |

**TOAST-classification**

| <b>Category</b> | <b>Paroxysmal<br/>Known<br/>(%)</b> | <b>AF<br/>New<br/>(%)</b> | <b>Persistent/<br/>Permanent AF<br/>(%)</b> | <b>Total<br/>(%)</b> |
|-----------------|-------------------------------------|---------------------------|---------------------------------------------|----------------------|
| Cardioembolic   | 74 (90.2)                           | 23 (79.3)                 | 248 (91.1)                                  | 345 (90.1)           |
| Large vessel    | 0 (0)                               | 0 (0)                     | 3 (1.1)                                     | 3 (0.8)              |
| Small vessel    | 1 (1.2)                             | 1 (3.4)                   | 0 (0)                                       | 2 (0.5)              |
| Undetermined    | 0 (0)                               | 0 (0)                     | 0 (0)                                       | 0 (0)                |
| Unknown         | 0 (0)                               | 0 (0)                     | 0 (0)                                       | 0 (0)                |
| Multiple        | 7 (8.5)                             | 5 (17.2)                  | 21 (7.7)                                    | 33 (8.6)             |
| Other           | 0 (0)                               | 0 (0)                     | 0 (0)                                       | 0 (0)                |
| <b>Total</b>    | <b>82 (100)</b>                     | <b>29 (100)</b>           | <b>272 (100)</b>                            | <b>383 (100)</b>     |

Table IV: Age-specific rate per 1000 population per year of incident AF-related ischaemic stroke in OCSF and OXVASC

| <b>OCSF<br/>(1981-86)</b>   | <b>Men</b> | <b>Rate per 1000 per year<br/>(95% CI)</b> | <b>Women</b> | <b>Rate per 1000 per year<br/>(95% CI)</b> | <b>Total</b> | <b>Rate per 1000 per year<br/>(95% CI)</b> |
|-----------------------------|------------|--------------------------------------------|--------------|--------------------------------------------|--------------|--------------------------------------------|
| <35                         | 0/25034    | --                                         | 0/22587      | --                                         | 0/47621      | --                                         |
| 35-44                       | 0/5959     | --                                         | 0/5777       | --                                         | 0/11736      | --                                         |
| 45-54                       | 0/4577     | --                                         | 1/4467       | <b>0.06 (0.00,0.31)</b>                    | 1/9044       | <b>0.03 (0.00,0.15)</b>                    |
| 55-64                       | 4/3986     | <b>0.25 (0.07,0.64)</b>                    | 3/4058       | <b>0.18 (0.04,0.54)</b>                    | 7/8044       | <b>0.22 (0.09,0.45)</b>                    |
| 65-74                       | 13/2766    | <b>1.17 (0.63,2.01)</b>                    | 12/3108      | <b>0.97 (0.5,1.69)</b>                     | 25/5874      | <b>1.06 (0.69,1.57)</b>                    |
| 75-84                       | 17/1223    | <b>3.48 (2.02,5.56)</b>                    | 18/2006      | <b>2.24 (1.33,3.55)</b>                    | 35/3229      | <b>2.71 (1.89,3.77)</b>                    |
| ≥85                         | 5/234      | <b>5.34 (1.73,12.47)</b>                   | 12/735       | <b>4.08 (2.11,7.13)</b>                    | 17/969       | <b>4.39 (2.55,7.02)</b>                    |
| Total                       | 39/43779   | <b>0.22 (0.16,0.3)</b>                     | 46/42738     | <b>0.27 (0.2,0.36)</b>                     | 85/86517     | <b>0.25 (0.2,0.3)</b>                      |
|                             |            |                                            |              | <b>Premorbid AF</b>                        | 56/86517     | <b>0.16 (0.12,0.21)</b>                    |
|                             |            |                                            |              | <b>New AF</b>                              | 29/86517     | <b>0.08 (0.06,0.12)</b>                    |
| <hr/>                       |            |                                            |              |                                            |              |                                            |
| <b>OXVASC<br/>(2002-12)</b> |            |                                            |              |                                            |              |                                            |
| <35                         | 0/22496    | --                                         | 0/20821      | --                                         | 0/43317      | --                                         |
| 35-44                       | 1/7219     | <b>0.01 (0,0.08)</b>                       | 0/6343       | --                                         | 1/13562      | <b>0.01 (0.00,0.04)</b>                    |
| 45-54                       | 3/6205     | <b>0.05 (0.01,0.14)</b>                    | 1/5836       | <b>0.02 (0.00,0.10)</b>                    | 4/12041      | <b>0.03 (0.01,0.09)</b>                    |
| 55-64                       | 18/5221    | <b>0.35 (0.20,0.54)</b>                    | 6/5015       | <b>0.12 (0.04,0.26)</b>                    | 24/10236     | <b>0.23 (0.15,0.35)</b>                    |
| 65-74                       | 40/3496    | <b>1.14 (0.82,1.56)</b>                    | 34/3685      | <b>0.92 (0.64,1.29)</b>                    | 74/7181      | <b>1.03 (0.81,1.29)</b>                    |
| 75-84                       | 73/2077    | <b>3.52 (2.76,4.42)</b>                    | 72/2660      | <b>2.71 (2.12,3.41)</b>                    | 145/4737     | <b>3.06 (2.58,3.60)</b>                    |
| ≥85                         | 36/532     | <b>6.77 (4.74,9.37)</b>                    | 99/1123      | <b>8.82 (7.17,10.74)</b>                   | 135/1654     | <b>8.16 (6.84,9.66)</b>                    |
| Total                       | 171/47246  | <b>0.36 (0.31,0.42)</b>                    | 212/45482    | <b>0.47 (0.41,0.53)</b>                    | 383/92728    | <b>0.41 (0.37,0.46)</b>                    |
|                             |            |                                            |              | <b>Premorbid AF</b>                        | 274/92728    | <b>0.30 (0.26,0.33)</b>                    |
|                             |            |                                            |              | <b>New AF</b>                              | 109/92728    | <b>0.12 (0.10,0.14)</b>                    |

\*Standardized to 2010 UK population

**Table V: Proportion of patients with incident ischaemic stroke and paroxysmal AF according to age <80 or ≥80**

| <b>Paroxysmal AF</b> | <b>OCSP (%)</b> | <b>OXVASC (%)</b> | <b>P value</b> |
|----------------------|-----------------|-------------------|----------------|
| <b>All AF</b>        |                 |                   |                |
| Age <80              | 12 (52.2)       | 52 (46.8)         | 0.64           |
| Age ≥80              | 11 (47.8)       | 59 (53.2)         |                |
| Total                | 23 (100)        | 111 (100)         |                |
| <b>Premorbid AF</b>  |                 |                   |                |
| Age <80              | 9 (56.2)        | 36 (43.9)         | 0.37           |
| Age ≥80              | 7 (43.8)        | 46 (56.1)         |                |
| Total                | 16 (100)        | 82 (100)          |                |
| <b>New AF</b>        |                 |                   |                |
| Age <80              | 3 (42.9)        | 16 (55.2)         | 0.68           |
| Age ≥80              | 4 (57.1)        | 13 (44.8)         |                |
| Total                | 7 (100)         | 29 (100)          |                |



**Table VI: Proportion of patients with non-disabling (1-month mRS <3) incident ischaemic stroke and any AF type or paroxysmal AF according to age <80 or ≥80**

| <b>Non-disabling incident ischaemic stroke</b> | <b>OCSP (%)</b> | <b>OXVASC (%)</b> | <b>P value</b> |
|------------------------------------------------|-----------------|-------------------|----------------|
| <b>Any AF type</b>                             |                 |                   |                |
| Age <80                                        | 27 (79.4)       | 77 (69.4)         | 0.26           |
| Age ≥80                                        | 7 (20.6)        | 34 (30.6)         |                |
| Total                                          | 34 (100)        | 111 (100)         |                |
| <b>Paroxysmal AF</b>                           |                 |                   |                |
| Age <80                                        | 5 (71.4)        | 31 (83.8)         | 0.59           |
| Age ≥80                                        | 2 (28.6)        | 6 (16.2)          |                |
| Total                                          | 7 (100)         | 37 (100)          |                |

Tables VIIA-D: Baseline characteristics of patients with AF-related events

Table VIIA: Baseline characteristics of patients with incident ischaemic stroke and known premorbid AF

|                                    | OCSF<br>(1981-86; n=56) | OXVASC<br>(2002-2012; n=274) | P value           |
|------------------------------------|-------------------------|------------------------------|-------------------|
| <b>Baseline characteristics</b>    |                         |                              |                   |
| Male sex (%)                       | 26 (46.4)               | 126 (46.0)                   | 0.952             |
| Mean age (SD)                      | 77.5 (8.8)              | 80.4 (9.4)                   | <b>0.038</b>      |
| <b>Premorbid risk factor</b>       |                         |                              |                   |
| Congestive cardiac failure         | 13 (23.2)               | 85 (31.0)                    | 0.244             |
| Hypertension                       | 40 (71.4)               | 208 (75.9)                   | 0.479             |
| Age≥75                             | 34 (60.7)               | 204 (74.5)                   | <b>0.037</b>      |
| Diabetes                           | 11 (19.6)               | 49 (17.9)                    | 0.756             |
| Previous TIA                       | 16 (28.6)               | 46 (16.8)                    | <b>0.040</b>      |
| Previous MI                        | 12 (21.4)               | 59 (21.5)                    | 0.986             |
| Angina                             | 10 (17.9)               | 87 (31.8)                    | <b>0.038</b>      |
| Current smoking                    | 13 (23.2)               | 17 (6.2)                     | <b>&lt;0.0001</b> |
| Hypercholesterolaemia <sup>#</sup> | 25 (44.6)               | 88 (32.1)                    | 0.072             |
| Peripheral vascular disease        | 5 (44.6)                | 40 (14.6)                    | 0.260             |
| Valvular heart disease             | 17 (30.4)               | 73 (26.6)                    | 0.570             |
| <b>Premorbid medications</b>       |                         |                              |                   |
| Antiplatelet agent(s)              | 5 (8.9)                 | 167 (60.9)                   | <b>&lt;0.0001</b> |
| Lipid lowering agent               | 0                       | 82 (29.9)                    | <b>&lt;0.0001</b> |
| Antihypertensive(s)                | 16 (28.6)               | 212 (77.4)                   | <b>&lt;0.0001</b> |
| Anticoagulant                      | 3 (5.4)                 | 46 (16.8)                    | <b>0.028</b>      |

<sup>#</sup>defined as ≥6.0 mmol/l

**Table VIIB: Baseline characteristics, medication use, outcome and case fatality in AF-related incident systemic emboli in OXVASC**

|                                    | <b>Total AF<br/>(n=71)</b> | <b>Premorbid AF<br/>(n=62)</b> |
|------------------------------------|----------------------------|--------------------------------|
| <b>Baseline characteristics</b>    |                            |                                |
| Male sex (%)                       | 27 (38.0)                  | 24 (38.7)                      |
| Mean age (SD)                      | 82.5 (9.8)                 | 83.4 (8.2)                     |
| <b>Premorbid risk factor</b>       |                            |                                |
| Congestive cardiac failure         | 25 (35.2)                  | 23 (37.1)                      |
| Hypertension                       | 55 (77.5)                  | 47 (75.8)                      |
| Age≥75                             | 57 (80.3)                  | 51 (82.3)                      |
| Diabetes                           | 10 (14.1)                  | 9 (14.5)                       |
| Previous TIA                       | 11 (15.5)                  | 10 (16.1)                      |
| Previous MI                        | 20 (28.2)                  | 19 (30.6)                      |
| Current smoking                    | 11 (15.5)                  | 7 (11.3)                       |
| Hypercholesterolaemia <sup>#</sup> | 30 (42.3)                  | 24 (38.7)                      |
| Peripheral vascular disease        | 16 (22.5)                  | 16 (25.8)                      |
| Valvular heart disease             | 12 (16.9)                  | 10 (16.1)                      |
| <b>Premorbid medications</b>       |                            |                                |
| Antiplatelet agent(s)              | 36 (50.7)                  | 32 (51.6)                      |
| Lipid lowering agent               | 27 (38.0)                  | 21 (33.9)                      |
| Antihypertensive(s)                | 54 (76.1)                  | 47 (75.8)                      |
| Anticoagulant                      | 10 (14.1)                  | 10 (16.1)                      |
| <b>Modified Rankin scale</b>       |                            |                                |
| 30 day [Mean (SD)]                 | 4.72 (1.7)                 | 4.81 (1.7)                     |
| 6 months [Mean (SD)]               | 4.85 (1.7)                 | 4.94 (1.7)                     |
| <b>Case fatality</b>               |                            |                                |
| 30 day (%)                         | 42 (59.2)                  | 38 (61.3)                      |
| 6 months (%)                       | 46 (64.8)                  | 42 (67.7)                      |

<sup>#</sup>defined as ≥6.0 mmol/l

**Table VIIC: Patients with incident ischaemic stroke at age  $\geq 80$  and any AF in OCSF versus OXVASC**

|                                    | <b>OCSF</b><br><b>(1981-86; n=34)</b> | <b>OXVASC</b><br><b>(2002-2012; n=224)</b> | <b>P value</b>    |
|------------------------------------|---------------------------------------|--------------------------------------------|-------------------|
| <b>Baseline characteristics</b>    |                                       |                                            |                   |
| Male sex (%)                       | 12 (35.3)                             | 83 (37.1)                                  | 0.843             |
| Mean age (SD)                      | 86.0 (4.4)                            | 86.6 (4.3)                                 | 0.472             |
| <b>Premorbid risk factor</b>       |                                       |                                            |                   |
| Congestive cardiac failure         | 12 (35.3)                             | 60 (26.8)                                  | 0.303             |
| Hypertension                       | 25 (73.5)                             | 177 (79.0)                                 | 0.469             |
| Diabetes                           | 5 (14.7)                              | 28 (12.5)                                  | 0.782             |
| Previous TIA                       | 6 (17.6)                              | 39 (17.4)                                  | 0.973             |
| Previous MI                        | 6 (17.6)                              | 46 (20.5)                                  | 0.696             |
| Angina                             | 6 (17.6)                              | 68 (30.4)                                  | 0.127             |
| Current smoking                    | 4 (11.8)                              | 5 (2.2)                                    | <b>0.020</b>      |
| Hypercholesterolaemia <sup>#</sup> | 11 (32.4)                             | 59 (26.3)                                  | 0.462             |
| Peripheral vascular disease        | 2 (5.9)                               | 36 (16.1)                                  | 0.190             |
| Valvular heart disease             | 8 (23.5)                              | 48 (21.4)                                  | 0.782             |
| <b>Premorbid medications</b>       |                                       |                                            |                   |
| Antiplatelet agent(s)              | 1 (2.9)                               | 127 (56.7)                                 | <b>&lt;0.0001</b> |
| Lipid lowering agent               | 0                                     | 54 (24.1)                                  | <b>0.0004</b>     |
| Antihypertensive(s)                | 5 (14.7)                              | 173 (77.2)                                 | <b>&lt;0.0001</b> |
| Anticoagulant                      | 0                                     | 15 (6.7)                                   | 0.231             |

<sup>#</sup>defined as  $\geq 6.0$  mmol/l

**Table VIII: Patients with ischaemic stroke at aged  $\geq 80$  and known prior AF in OCSP versus OXVASC**

|                                    | <b>OCSP</b><br><b>(1981-86; n=23)</b> | <b>OXVASC</b><br><b>(2002-2012; n=164)</b> | <b>P value</b>    |
|------------------------------------|---------------------------------------|--------------------------------------------|-------------------|
| <b>Baseline characteristics</b>    |                                       |                                            |                   |
| Male sex (%)                       | 10 (43.5)                             | 61 (37.2)                                  | 0.561             |
| Mean age (SD)                      | 85.8 (4.7)                            | 86.6 (4.3)                                 | 0.424             |
| <b>Premorbid risk factor</b>       |                                       |                                            |                   |
| Congestive cardiac failure         | 8 (34.8)                              | 52 (31.7)                                  | 0.767             |
| Hypertension                       | 17 (73.9)                             | 135 (82.3)                                 | 0.390             |
| Diabetes                           | 4 (17.4)                              | 27 (16.5)                                  | 1.000             |
| Previous TIA                       | 5 (21.7)                              | 30 (18.3)                                  | 0.775             |
| Previous MI                        | 6 (26.1)                              | 37 (22.6)                                  | 0.707             |
| Angina                             | 3 (13.0)                              | 58 (35.4)                                  | <b>0.034</b>      |
| Current smoking                    | 3 (13.0)                              | 1 (0.6)                                    | <b>0.006</b>      |
| Hypercholesterolaemia <sup>#</sup> | 6 (26.1)                              | 46 (28.0)                                  | 0.844             |
| Peripheral vascular disease        | 1 (4.3)                               | 25 (15.2)                                  | 0.209             |
| Valvular heart disease             | 5 (21.7)                              | 41 (25.0)                                  | 0.734             |
| <b>Premorbid medications</b>       |                                       |                                            |                   |
| Antiplatelet agent(s)              | 0                                     | 108 (65.9)                                 | <b>&lt;0.0001</b> |
| Lipid lowering agent               | 0                                     | 46 (28.0)                                  | <b>0.001</b>      |
| Antihypertensive(s)                | 4 (2.9)                               | 134 (81.7)                                 | <b>&lt;0.0001</b> |
| Anticoagulant                      | 0                                     | 14 (8.5)                                   | 0.224             |

<sup>#</sup>defined as  $\geq 6.0$  mmol/l

**Table VIII: Comparison of functional outcome and case fatality at 1-month and 6-month follow up in first-ever ischaemic stroke with any and premorbid AF in OXVASC and OCSP; mRS= modified Rankin scale; \*missing data in 4-6%**

| <b>Total AF</b>     | <b>OCSP (n=85)</b> | <b>OXVASC (n=383)</b> | <b>P value</b> |
|---------------------|--------------------|-----------------------|----------------|
| <b>30 days</b>      |                    |                       |                |
| mRS                 |                    |                       |                |
| Mean (SD)           | 3.48 (1.9)         | 3.66 (1.9)*           | 0.428          |
| Median              | 3                  | 4                     |                |
| Case fatality (%)   | 21 (24.7)          | 88 (23.0)             | 0.733          |
| <b>6 months</b>     |                    |                       |                |
| mRS                 |                    |                       |                |
| Mean (SD)           | 3.72 (2.1)         | 3.80 (2.1)*           | 0.760          |
| Median              | 4                  | 4                     |                |
| Case fatality (%)   | 32 (37.6)          | 143 (37.3)            | 0.957          |
| <b>Premorbid AF</b> | <b>OCSP (n=56)</b> | <b>OXVASC (n=274)</b> | <b>P value</b> |
| <b>30 days</b>      |                    |                       |                |
| mRS                 |                    |                       |                |
| Mean (SD)           | 3.71 (1.9)         | 3.80 (1.8)*           | 0.748          |
| Median              | 3                  | 4                     |                |
| Case fatality (%)   | 17 (30.4)          | 71 (25.9)             | 0.493          |
| <b>6 months</b>     |                    |                       |                |
| mRS                 |                    |                       |                |
| Mean (SD)           | 3.73 (2.1)         | 3.91 (2.1)*           | 0.557          |
| Median              | 4                  | 4                     |                |
| Case fatality (%)   | 21 (37.5)          | 109 (39.8)            | 0.750          |

**Table IX: Relationship between premorbid antithrombotic therapy, pre-morbid risk scores and age in patients with incident ischaemic stroke and systemic embolism with known prior AF in OXVASC**

|                          | <b>CHADS<sub>2</sub></b><br>Mean (Median) | <b>CHA<sub>2</sub>DS<sub>2</sub>VASc</b><br>Mean (Median) | <b>HAS-BLED*</b><br>Mean (Median) | <b>Warfarin</b><br>[n (%)] | <b>No anti-thrombotics</b><br>[n (%)] | <b>Mono-antiplatelet</b><br>[n (%)] | <b>Dual-antiplatelet</b><br>[n (%)] |
|--------------------------|-------------------------------------------|-----------------------------------------------------------|-----------------------------------|----------------------------|---------------------------------------|-------------------------------------|-------------------------------------|
| <b>Ischaemic stroke</b>  |                                           |                                                           |                                   |                            |                                       |                                     |                                     |
| <b>Age group</b>         |                                           |                                                           |                                   |                            |                                       |                                     |                                     |
| <60 (n=8)                | 1.38 (1.5)                                | 1.88 (1.5)                                                | 0.75 (1)                          | 5 (62.5)                   | 1 (12.5)                              | 2 (25.0)                            | 0                                   |
| 60-69 (n=27)             | 1.41 (1)                                  | 2.67 (2)                                                  | 1.33 (1)                          | 7 (25.9)                   | 7 (25.9)                              | 13 (48.1)                           | 0                                   |
| 70-79 (n=75)             | 2.01 (2)                                  | 3.76 (4)                                                  | 1.77 (2)                          | 20 (26.7)                  | 15 (20.0)                             | 38 (50.7)                           | 2 (2.7)                             |
| 80-89 (n=118)            | 2.64 (2.5)                                | 4.57 (4)                                                  | 1.47 (1)                          | 14 (11.9)                  | 32 (27.1)                             | 69 (58.5)                           | 3 (2.5)                             |
| ≥90 (n=46)               | 2.74 (2.5)                                | 4.80 (5)                                                  | 1.65 (2)                          | 0                          | 11 (23.9)                             | 33 (71.7)                           | 2 (4.3)                             |
| Total                    | 2.32 (2)                                  | 4.12 (4)                                                  | 1.55 (1)                          | 46 (16.8)                  | 66 (24.1)                             | 155 (56.6)                          | 7 (2.6)                             |
| <b>Systemic embolism</b> |                                           |                                                           |                                   |                            |                                       |                                     |                                     |
| <b>Age group</b>         |                                           |                                                           |                                   |                            |                                       |                                     |                                     |
| <60 (n=1)                | 0                                         | 0                                                         | 1 (1)                             | 0                          | 0                                     | 1 (100)                             | 0                                   |
| 60-69 (n=1)              | 1.00 (1.00)                               | 3.00 (3.0)                                                | 1 (1)                             | 1 (100)                    | 0                                     | 0                                   | 0                                   |
| 70-79 (n=16)             | 2.31 (2.5)                                | 4.56 (4.5)                                                | 2.19 (2)                          | 4 (25.0)                   | 4 (25.0)                              | 6 (37.5)                            | 2 (12.5)                            |
| 80-89 (n=29)             | 3.21 (3)                                  | 5.48 (6)                                                  | 2.34 (2)                          | 5 (17.2)                   | 10 (34.5)                             | 14 (48.3)                           | 0                                   |
| ≥90 (n=15)               | 2.40 (2)                                  | 4.67 (5)                                                  | 2.20 (2)                          | 0                          | 6 (40.0)                              | 6 (40.0)                            | 3 (20.0)                            |
| Total                    | 2.69 (3)                                  | 4.92 (5)                                                  | 2.23 (2)                          | 10 (16.1)                  | 20 (32.3)                             | 27 (43.5)                           | 5 (8.1)                             |

\*We did not have information on labile INR in those patients on pre-morbid warfarin and hence the maximum HAS-BLED score was out of eight instead of nine.

Tables XA-B: Premorbid warfarin use according to premorbid CHADS<sub>2</sub>, CHA<sub>2</sub>DS<sub>2</sub>VASc and HAS-BLED scores in patients with incident ischaemic stroke (XA) and systemic embolism (XB) and known prior AF in OXVASC

XA) Ischaemic stroke with known prior AF

|                         |              | Premorbid CHADS <sub>2</sub> (%) |           |           |           |           |          |         |            |  |
|-------------------------|--------------|----------------------------------|-----------|-----------|-----------|-----------|----------|---------|------------|--|
|                         |              | 0                                | 1         | 2         | 3         | 4         | 5        | 6       | Total      |  |
| Premorbid Warfarin use: | Yes          | 3 (16.7)                         | 10 (21.3) | 12 (12.6) | 14 (20.3) | 5 (14.7)  | 1 (11.1) | 1 (50)  | 46 (16.8)  |  |
|                         | No           | 15 (83.3)                        | 37 (78.7) | 83 (87.4) | 55 (79.7) | 29 (85.3) | 8 (88.9) | 1 (50)  | 228 (83.2) |  |
|                         | <b>Total</b> | 18 (100)                         | 47 (100)  | 95 (100)  | 69 (100)  | 34 (100)  | 9 (100)  | 2 (100) | 274 (100)  |  |

  

|                         |              | Premorbid CHA <sub>2</sub> DS <sub>2</sub> VASc score (%) |           |           |           |          |           |           |           |         |         |            |
|-------------------------|--------------|-----------------------------------------------------------|-----------|-----------|-----------|----------|-----------|-----------|-----------|---------|---------|------------|
|                         |              | 0                                                         | 1         | 2         | 3         | 4        | 5         | 6         | 7         | 8       | 9       | Total      |
| Premorbid Warfarin use: | Yes          | 1 (20)                                                    | 2 (16.7)  | 5 (27.8)  | 9 (17.0)  | 12 (15)  | 9 (16.1)  | 5 (15.2)  | 2 (15.4)  | 0 (0)   | 1 (100) | 46 (16.8)  |
|                         | No           | 4 (80)                                                    | 10 (83.3) | 13 (72.2) | 44 (83.0) | 68 (85)  | 47 (83.9) | 28 (84.8) | 11 (84.6) | 3 (100) | 0 (0)   | 228 (83.2) |
|                         | <b>Total</b> | 5 (100)                                                   | 12 (100)  | 18 (100)  | 53 (100)  | 80 (100) | 56 (100)  | 33 (100)  | 13 (100)  | 3 (100) | 1 (100) | 274 (100)  |

  

|                         |              | Premorbid HAS-BLED score (%) |            |           |           |         |            |
|-------------------------|--------------|------------------------------|------------|-----------|-----------|---------|------------|
|                         |              | 0                            | 1          | 2         | 3         | 4       | Total      |
| Premorbid Warfarin use: | Yes          | 3 (50)                       | 25 (17.4)  | 14 (14.6) | 3 (13.0)  | 1 (20)  | 46 (16.8)  |
|                         | No           | 3 (50)                       | 119 (82.6) | 82 (85.4) | 20 (87.0) | 4 (80)  | 228 (83.2) |
|                         | <b>Total</b> | 6 (100)                      | 144 (100)  | 96 (100)  | 23 (100)  | 5 (100) | 274 (100)  |



**XB) Systemic embolism with known prior AF**

|                                    |  | <b>Premorbid CHADS<sub>2</sub> (%)</b> |           |           |           |          |          |          |              |
|------------------------------------|--|----------------------------------------|-----------|-----------|-----------|----------|----------|----------|--------------|
|                                    |  | <b>0</b>                               | <b>1</b>  | <b>2</b>  | <b>3</b>  | <b>4</b> | <b>5</b> | <b>6</b> | <b>Total</b> |
| <b>Premorbid Warfarin use: Yes</b> |  | 1 (50)                                 | 2 (16.7)  | 3 (21.4)  | 3 (18.8)  | 0 (0)    | 1 (20)   | 0 (0)    | 10 (16.1)    |
| <b>No</b>                          |  | 1 (50)                                 | 10 (83.3) | 11 (78.6) | 13 (81.3) | 12 (100) | 4 (80)   | 1 (100)  | 52 (83.9)    |
| <b>Total</b>                       |  | 2 (100)                                | 12 (100)  | 14 (100)  | 16 (100)  | 12 (100) | 5 (100)  | 1 (100)  | 62 (100)     |

  

|                                    |  | <b>Premorbid CHA<sub>2</sub>DS<sub>2</sub>VASc score (%)</b> |          |          |          |           |           |           |          |          |              |
|------------------------------------|--|--------------------------------------------------------------|----------|----------|----------|-----------|-----------|-----------|----------|----------|--------------|
|                                    |  | <b>0</b>                                                     | <b>1</b> | <b>2</b> | <b>3</b> | <b>4</b>  | <b>5</b>  | <b>6</b>  | <b>7</b> | <b>8</b> | <b>Total</b> |
| <b>Premorbid Warfarin use: Yes</b> |  | 0 (0)                                                        | 0 (0)    | 1 (20)   | 2 (33.3) | 2 (16.7)  | 3 (23.1)  | 1 (7.1)   | 1 (12.5) | 0 (0)    | 10 (16.1)    |
| <b>No</b>                          |  | 1 (100)                                                      | 0 (0)    | 4 (80)   | 4 (66.7) | 10 (83.3) | 10 (76.9) | 13 (92.9) | 7 (87.5) | 3 (100)  | 52 (83.9)    |
| <b>Total</b>                       |  | 1 (100)                                                      | 0 (0)    | 5 (100)  | 6 (100)  | 12 (100)  | 13 (100)  | 14 (100)  | 8 (100)  | 3 (100)  | 62 (100)     |

  

|                                    |  | <b>Premorbid HAS-BLED score (%)</b> |          |           |          |          |              |
|------------------------------------|--|-------------------------------------|----------|-----------|----------|----------|--------------|
|                                    |  | <b>0</b>                            | <b>1</b> | <b>2</b>  | <b>3</b> | <b>4</b> | <b>Total</b> |
| <b>Premorbid Warfarin use: Yes</b> |  | 0 (0)                               | 5 (38.5) | 2 (7.1)   | 3 (20)   | 0 (0)    | 10 (16.1)    |
| <b>No</b>                          |  | 0 (0)                               | 8 (61.5) | 26 (92.9) | 12 (80)  | 6 (100)  | 52 (83.9)    |
| <b>Total</b>                       |  | 0 (0)                               | 13 (100) | 28 (100)  | 15 (100) | 6 (100)  | 62 (100)     |

**Table XI: Comparison of premorbid CHADS<sub>2</sub> and HAS-BLED scores in patients with incident embolic events and known prior AF but not on anticoagulation in OXVASC**

(A) All ages

|                                         |   | Premorbid HAS-BLED score (/9) (%) |           |           |          |          | Total     |
|-----------------------------------------|---|-----------------------------------|-----------|-----------|----------|----------|-----------|
|                                         |   | 0                                 | 1         | 2         | 3        | 4        |           |
| Premorbid<br>CHADS <sub>2</sub><br>(/6) | 0 | 2 (66.7)                          | 7 (5.5)   | 6 (5.6)   | 1 (3.1)  | 0 (0)    | 16 (5.7)  |
|                                         | 1 | 1 (33.3)                          | 28 (22.0) | 13 (12.0) | 5 (15.6) | 0 (0)    | 47 (16.8) |
|                                         | 2 | 0 (0)                             | 43 (33.9) | 40 (37.0) | 9 (28.1) | 2 (20)   | 94 (33.6) |
|                                         | 3 | 0 (0)                             | 31 (24.4) | 24 (22.2) | 8 (25)   | 5 (50)   | 68 (24.3) |
|                                         | 4 | 0 (0)                             | 15 (11.8) | 16 (14.8) | 8 (25)   | 2 (20)   | 41 (14.6) |
|                                         | 5 | 0 (0)                             | 3 (2.4)   | 7 (6.5)   | 1 (3.1)  | 1 (10)   | 12 (4.3)  |
|                                         | 6 | 0 (0)                             | 0 (0)     | 2 (1.9)   | 0 (0)    | 0 (0)    | 2 (0.7)   |
| Total                                   |   | 3 (100)                           | 127 (100) | 108 (100) | 32 (100) | 10 (100) | 280 (100) |

(B) Age ≥80

|                                         |   | Premorbid HAS-BLED score (/9) (%) |           |          |          | Total     |
|-----------------------------------------|---|-----------------------------------|-----------|----------|----------|-----------|
|                                         |   | 1                                 | 2         | 3        | 4        |           |
| Premorbid<br>CHADS <sub>2</sub><br>(/6) | 1 | 16 (17.8)                         | 6 (8.5)   | 0 (0)    | 0 (0)    | 22 (11.6) |
|                                         | 2 | 34 (37.8)                         | 26 (36.6) | 7 (31.8) | 2 (33.3) | 69 (36.5) |
|                                         | 3 | 25 (27.8)                         | 17 (23.9) | 7 (31.8) | 2 (33.3) | 51 (27.0) |
|                                         | 4 | 12 (13.3)                         | 14 (19.7) | 7 (31.8) | 1 (16.7) | 34 (18.0) |
|                                         | 5 | 3 (3.3)                           | 6 (8.5)   | 1 (4.5)  | 1 (16.7) | 11 (5.8)  |
|                                         | 6 | 0 (0)                             | 2 (2.8)   | 0 (0)    | 0 (0)    | 2 (1.1)   |
| Total                                   |   | 90 (100)                          | 71 (100)  | 22 (100) | 6 (100)  | 189 (100) |

(C) All ages and excluding absolute or relative contraindication

|                                         |   | Premorbid HAS-BLED score (/9) (%) |           |           |          |          | Total     |
|-----------------------------------------|---|-----------------------------------|-----------|-----------|----------|----------|-----------|
|                                         |   | 0                                 | 1         | 2         | 3        | 4        |           |
| Premorbid<br>CHADS <sub>2</sub><br>(/6) | 0 | 1 (50)                            | 4 (5.1)   | 4 (6.7)   | 1 (4.5)  | 0 (0)    | 10 (5.9)  |
|                                         | 1 | 1 (50)                            | 18 (23.1) | 5 (8.3)   | 3 (13.6) | 0 (0)    | 27 (15.9) |
|                                         | 2 | 0 (0)                             | 24 (30.8) | 21 (35.0) | 3 (13.6) | 2 (25.0) | 50 (29.4) |
|                                         | 3 | 0 (0)                             | 21 (26.9) | 15 (25.0) | 8 (36.4) | 3 (37.5) | 47 (27.6) |
|                                         | 4 | 0 (0)                             | 8 (10.3)  | 10 (16.7) | 6 (27.3) | 2 (25.0) | 26 (15.3) |
|                                         | 5 | 0 (0)                             | 3 (3.8)   | 5 (8.3)   | 1 (4.5)  | 1 (12.5) | 10 (5.9)  |
| Total                                   |   | 2                                 | 78 (100)  | 60 (100)  | 22 (100) | 8 (100)  | 170 (100) |

(D) Age ≥80 and excluding absolute or relative contraindication

|                                         |   | Premorbid HAS-BLED score (/9) (%) |           |          |         | Total     |
|-----------------------------------------|---|-----------------------------------|-----------|----------|---------|-----------|
|                                         |   | 1                                 | 2         | 3        | 4       |           |
| Premorbid<br>CHADS <sub>2</sub><br>(/6) | 1 | 11 (20.0)                         | 3 (7.7)   | 0 (0)    | 0 (0)   | 14 (12.2) |
|                                         | 2 | 20 (36.4)                         | 11 (28.2) | 3 (18.7) | 2 (40)  | 36 (31.3) |
|                                         | 3 | 15 (27.3)                         | 12 (30.8) | 7 (43.7) | 1 (20)  | 35 (30.4) |
|                                         | 4 | 6 (10.9)                          | 9 (23.1)  | 5 (31.3) | 1 (20)  | 21 (18.3) |
|                                         | 5 | 3 (5.5)                           | 4 (10.3)  | 1 (6.3)  | 1 (20)  | 9 (7.8)   |
| Total                                   |   | 55 (100)                          | 39 (100)  | 16 (100) | 5 (100) | 115 (100) |

**Table XII: Reasons for no premorbid warfarin use in patients at all ages and at age  $\geq 80$  years with incident embolic events, known prior AF and CHADS<sub>2</sub> score  $\geq 2$  in OXVASC**

|                                       | Number (%)          |                          |
|---------------------------------------|---------------------|--------------------------|
|                                       | All ages<br>(n=217) | Age $\geq 80$<br>(n=167) |
| No explanation                        | 135 (62.2)          | 103 (61.7)               |
| Patient refusal                       | 21 (9.7)            | 15 (9.0)                 |
| Paroxysmal AF                         | 7 (3.2)             | 5 (3.0)                  |
| In clinical trial                     | 1 (0.5)             | 1 (0.6)                  |
| Previous cardioversion                | 1 (0.5)             | 0 (0)                    |
| Low CHADS <sub>2</sub> score          | 1 (0.5)             | 0 (0)                    |
| <b>Absolute contraindication</b>      |                     |                          |
| Multiple contraindications            | 4 (1.8)             | 3 (1.8)                  |
| Recent, active bleed                  | 2 (0.9)             | 2 (1.2)                  |
| Non-compliant                         | 1 (0.5)             | 1 (0.6)                  |
| <b>Relative contraindication</b>      |                     |                          |
| Previous bleed                        | 14 (6.5)            | 12 (7.2)                 |
| Risk of falls                         | 12 (5.5)            | 10 (6.0)                 |
| Dementia                              | 7 (3.2)             | 7 (4.2)                  |
| Physician perception of unsuitability | 4 (1.8)             | 2 (1.2)                  |
| Concurrent cancer                     | 2 (0.9)             | 1 (0.6)                  |
| Anaemia                               | 2 (0.9)             | 2 (1.2)                  |
| Renal or hepatic impairment           | 1 (0.5)             | 1 (0.6)                  |
| Old age                               | 1 (0.5)             | 1 (0.6)                  |
| Frequent seizures                     | 1 (0.5)             | 1 (0.6)                  |

**Table XIII: Reasons for stopping previous warfarin at any point prior to an embolic event in OXVASC; OAC=anticoagulation**

**All ages**

|                                                           | Frequency | Percent |
|-----------------------------------------------------------|-----------|---------|
| 1. OAC never started                                      | 258       | 92.1    |
| 2. Stopped due to absolute contraindication               | 3         | 1.1     |
| 3. Stopped due to relative contraindication               | 7         | 2.5     |
| 4. Stopped for minor illness but forgot to restart        | 1         | 0.4     |
| 5. Stopped OAC for no apparent reason                     | 5         | 1.8     |
| 6. Stopped or changed to antiplatelets as in sinus rhythm | 2         | 0.7     |
| 7. Stopped as patient later declined                      | 1         | 0.4     |
| 8. Changed to antiplatelet for no obvious reason          | 3         | 1.1     |
| Total                                                     | 280       | 100.0   |

**Age ≥80**

|                                                           | Frequency | Percent |
|-----------------------------------------------------------|-----------|---------|
| 1. OAC never started                                      | 179       | 94.7    |
| 2. Stopped due to absolute contraindication               | 3         | 1.6     |
| 3. Stopped due to relative contraindication               | 2         | 1.1     |
| 4. Stopped for minor illness but forgot to restart        | 1         | 0.5     |
| 5. Stopped OAC for no apparent reason                     | 1         | 0.5     |
| 6. Stopped or changed to antiplatelets as in sinus rhythm | 1         | 0.5     |
| 7. Stopped as patient later declined                      | 0         | 0       |
| 8. Changed to antiplatelet for no obvious reason          | 2         | 1.1     |
| Total                                                     | 189       | 100.0   |

**Tables XIVA-B: Changes in disability status (modified Ranking scale – mRS) in patients with an incident ischaemic stroke or systemic embolism but not on pre-morbid anticoagulants.**

**Table XIVA: Changes in disability status (modified Ranking scale – mRS) in patients with an incident ischaemic stroke or systemic embolism and any AF but not on pre-morbid anticoagulants.**

**All ages**

| All events       |       | 6 month mRS (%) |           |           |           |            |
|------------------|-------|-----------------|-----------|-----------|-----------|------------|
|                  |       | 0-2             | 3         | 4-5       | 6         | Total      |
| Pre-morbid mRS   | 0-2   | 112 (97.4)      | 32 (60.4) | 34 (61.8) | 80 (46.0) | 258 (65.0) |
|                  | 3     | 3 (2.6)         | 21 (39.6) | 11 (20.0) | 67 (38.5) | 102 (25.7) |
|                  | 4-5   | 0 (0)           | 0 (0)     | 10 (18.2) | 27 (15.5) | 37 (9.3)   |
|                  | Total | 115 (100)       | 53 (100)  | 55 (100)  | 174 (100) | 397 (100)  |
| Ischaemic stroke |       | 6 month mRS (%) |           |           |           |            |
|                  |       | 0-2             | 3         | 4-5       | 6         | Total      |
| Pre-morbid mRS   | 0-2   | 102 (97.1)      | 29 (58)   | 32 (65.3) | 62 (47.0) | 225 (67.0) |
|                  | 3     | 3 (2.9)         | 21 (42)   | 7 (14.3)  | 49 (37.1) | 80 (23.8)  |
|                  | 4-5   | 0 (0)           | 0 (0)     | 10 (20.4) | 21 (15.9) | 31 (9.2)   |
|                  | Total | 105 (100)       | 50 (100)  | 49 (100)  | 132 (100) | 336 (100)  |

**Age ≥80**

| All events       |       | 6 month mRS (%) |           |           |           |            |
|------------------|-------|-----------------|-----------|-----------|-----------|------------|
|                  |       | 0-2             | 3         | 4-5       | 6         | Total      |
| Pre-morbid mRS   | 0-2   | 40 (95.2)       | 16 (50)   | 23 (57.5) | 58 (42.0) | 137 (54.4) |
|                  | 3     | 2 (4.8)         | 16 (50)   | 9 (22.5)  | 56 (40.6) | 83 (32.9)  |
|                  | 4-5   | 0 (0)           | 0 (0)     | 8 (20.0)  | 24 (17.4) | 32 (12.7)  |
|                  | Total | 42 (100)        | 32 (100)  | 40 (100)  | 138 (100) | 252 (100)  |
| Ischaemic stroke |       | 6 month mRS (%) |           |           |           |            |
|                  |       | 0-2             | 3         | 4-5       | 6         | Total      |
| Pre-morbid mRS   | 0-2   | 38 (95)         | 14 (46.7) | 21 (61.8) | 47 (44.8) | 120 (57.4) |
|                  | 3     | 2 (5)           | 16 (53.3) | 5 (14.7)  | 40 (38.1) | 63 (30.1)  |
|                  | 4-5   | 0 (0)           | 0 (0)     | 8 (23.5)  | 18 (17.1) | 26 (12.4)  |
|                  | Total | 40 (100)        | 30 (100)  | 34 (100)  | 105 (100) | 209 (100)  |

**Table XIVB: Changes in disability status (modified Ranking scale – mRS) in patients with an incident ischaemic stroke or systemic embolism and known prior AF but not on pre-morbid anticoagulants.**

**All ages**

| All events     |       | 6 month mRS (%) |           |           |           |            |
|----------------|-------|-----------------|-----------|-----------|-----------|------------|
|                |       | 0-2             | 3         | 4-5       | 6         | Total      |
| Pre-morbid mRS | 0-2   | 70 (97.2)       | 23 (65.7) | 21 (58.3) | 64 (46.7) | 178 (63.6) |
|                | 3     | 2 (2.8)         | 12 (34.3) | 8 (22.2)  | 54 (39.4) | 76 (27.1)  |
|                | 4-5   | 0 (0)           | 0 (0)     | 7 (19.4)  | 19 (13.9) | 26 (9.3)   |
|                | Total | 72 (100)        | 35 (100)  | 36 (100)  | 137 (100) | 280 (100)  |

| Ischaemic stroke |       | 6 month mRS (%) |           |           |           |            |
|------------------|-------|-----------------|-----------|-----------|-----------|------------|
|                  |       | 0-2             | 3         | 4-5       | 6         | Total      |
| Pre-morbid mRS   | 0-2   | 62 (96.9)       | 21 (63.6) | 19 (59.4) | 49 (49.5) | 151 (66.2) |
|                  | 3     | 2 (3.1)         | 12 (36.4) | 6 (18.8)  | 37 (37.4) | 57 (25.0)  |
|                  | 4-5   | 0 (0)           | 0 (0)     | 7 (21.8)  | 13 (13.1) | 20 (8.8)   |
|                  | Total | 64 (100)        | 33 (100)  | 32 (100)  | 99 (100)  | 228 (100)  |

**Age ≥80**

| All events     |       | 6 month mRS (%) |           |           |           |           |
|----------------|-------|-----------------|-----------|-----------|-----------|-----------|
|                |       | 0-2             | 3         | 4-5       | 6         | Total     |
| Pre-morbid mRS | 0-2   | 26 (92.9)       | 12 (54.5) | 14 (53.8) | 47 (41.6) | 99 (52.4) |
|                | 3     | 2 (7.1)         | 10 (45.5) | 7 (26.9)  | 48 (42.5) | 67 (35.4) |
|                | 4-5   | 0 (0)           | 0 (0)     | 5 (19.3)  | 18 (15.9) | 23 (12.2) |
|                | Total | 28 (100)        | 22 (100)  | 26 (100)  | 113 (100) | 189 (100) |

| Ischaemic stroke |       | 6 month mRS (%) |          |           |           |           |
|------------------|-------|-----------------|----------|-----------|-----------|-----------|
|                  |       | 0-2             | 3        | 4-5       | 6         | Total     |
| Pre-morbid mRS   | 0-2   | 24 (92.3)       | 10 (50)  | 12 (54.6) | 38 (46.4) | 84 (56.0) |
|                  | 3     | 2 (7.7)         | 10 (50)  | 5 (22.7)  | 32 (39.0) | 49 (32.7) |
|                  | 4-5   | 0 (0)           | 0 (0)    | 5 (22.7)  | 12 (14.6) | 17 (11.3) |
|                  | Total | 26 (100)        | 20 (100) | 22 (100)  | 82 (100)  | 150 (100) |

**Table XVA: Care costs for incident embolic vascular events in non-anticoagulated patients with known prior AF, extrapolated from OXVASC across the UK**

| Age                                                                   | Rate/1,000/year<br>(95% CI) |       |       | % of patients not treated<br>with warfarin |       |       | UK Population Projections<br>2010 (in 1000s) |        |        | Number of events in<br>patients with untreated<br>known-AF |        |        | Cost of event<br>(patients with<br>untreated known-AF) | Total cost of events in patients<br>with untreated known-AF,<br>£ (in 000s) |          |          |
|-----------------------------------------------------------------------|-----------------------------|-------|-------|--------------------------------------------|-------|-------|----------------------------------------------|--------|--------|------------------------------------------------------------|--------|--------|--------------------------------------------------------|-----------------------------------------------------------------------------|----------|----------|
|                                                                       | Men                         | Women | Total | Men                                        | Women | Total | Men                                          | Women  | Total  | Men                                                        | Women  | Total  | £, per patient                                         | Men                                                                         | Women    | Total    |
| <b>Ischaemic stroke in patients with known AF (i.e. premorbid AF)</b> |                             |       |       |                                            |       |       |                                              |        |        |                                                            |        |        |                                                        |                                                                             |          |          |
| <80                                                                   | 0.14                        | 0.10  | 0.12  | 68%                                        | 76%   | 71%   | 29,576                                       | 29,782 | 59,359 | 2,836                                                      | 2,345  | 5,181  | £17,442                                                | £49,460                                                                     | £40,907  | £90,367  |
| 80-84                                                                 | 4.50                        | 2.28  | 3.19  | 86%                                        | 89%   | 88%   | 607                                          | 886    | 1,493  | 2,364                                                      | 1,795  | 4,159  | £26,454                                                | £62,547                                                                     | £47,474  | £110,021 |
| 85-89                                                                 | 4.16                        | 5.21  | 4.84  | 94%                                        | 87%   | 89%   | 326                                          | 608    | 935    | 1,270                                                      | 2,751  | 4,021  | £26,454                                                | £33,608                                                                     | £72,773  | £106,381 |
| ≥90                                                                   | 5.45                        | 9.68  | 8.53  | 100%                                       | 100%  | 100%  | 134                                          | 342    | 476    | 730                                                        | 3,312  | 4,042  | £26,454                                                | £19,305                                                                     | £87,613  | £106,918 |
| Total                                                                 | 0.27                        | 0.33  | 0.30  | 79%                                        | 87%   | 83%   | 30,643                                       | 31,619 | 62,262 | 7,200                                                      | 10,203 | 17,403 |                                                        | £164,919                                                                    | £248,767 | £413,686 |
| <80                                                                   |                             |       |       |                                            |       |       |                                              |        | 59,359 |                                                            |        | 5,181  |                                                        |                                                                             |          | £90,367  |
| ≥80                                                                   |                             |       |       |                                            |       |       |                                              |        | 2,904  |                                                            |        | 12,222 |                                                        |                                                                             |          | £323,319 |
| <b>Systemic emboli in patients with known AF (i.e. premorbid AF)</b>  |                             |       |       |                                            |       |       |                                              |        |        |                                                            |        |        |                                                        |                                                                             |          |          |
| <80                                                                   | 0.02                        | 0.02  | 0.02  | 68%                                        | 76%   | 71%   | 29,576                                       | 29,782 | 59,359 | 393                                                        | 469    | 862    | £3,651                                                 | £1,434                                                                      | £1,713   | £3,146   |
| 80-84                                                                 | 0.61                        | 0.59  | 0.60  | 86%                                        | 89%   | 88%   | 607                                          | 886    | 1,493  | 319                                                        | 465    | 785    | £14,842                                                | £4,740                                                                      | £6,907   | £11,647  |
| 85-89                                                                 | 1.30                        | 1.51  | 1.43  | 94%                                        | 87%   | 89%   | 326                                          | 608    | 935    | 397                                                        | 796    | 1,193  | £14,842                                                | £5,892                                                                      | £11,818  | £17,710  |
| ≥90                                                                   | 3.40                        | 2.80  | 2.97  | 100%                                       | 100%  | 100%  | 134                                          | 342    | 476    | 455                                                        | 958    | 1,413  | £14,842                                                | £6,758                                                                      | £14,216  | £20,973  |
| Total                                                                 | 0.05                        | 0.08  | 0.07  | 79%                                        | 87%   | 83%   | 30,643                                       | 31,619 | 62,262 | 1,564                                                      | 2,688  | 4,253  |                                                        | £18,824                                                                     | £34,653  | £53,477  |
| <80                                                                   | 0.02                        | 0.02  | 0.02  | 68%                                        | 76%   | 71%   |                                              |        | 59,359 |                                                            |        | 862    |                                                        |                                                                             |          | £3,146   |
| ≥80                                                                   | 0.61                        | 0.59  | 0.60  | 86%                                        | 89%   | 88%   |                                              |        | 2,904  |                                                            |        | 3,391  |                                                        |                                                                             |          | £50,331  |



**Table XVB: Care costs for AF-related incident embolic vascular events extrapolated from OXVASC across the UK, projections for 2050**

| Age                               | Rate/1,000/year<br>(95% CI) |       |       | UK Population<br>Projections 2050<br>(in 1000s) |        |        | Number of AF-related<br>events |        |        | Cost of<br>AF-related<br>events | Total cost of AF-related events<br>£ (in 000s) |          |            |
|-----------------------------------|-----------------------------|-------|-------|-------------------------------------------------|--------|--------|--------------------------------|--------|--------|---------------------------------|------------------------------------------------|----------|------------|
|                                   | Men                         | Women | Total | Men                                             | Women  | Total  | Men                            | Women  | Total  | £, per<br>patient               | Men                                            | Women    | Total      |
| <b>AF-related IS</b>              |                             |       |       |                                                 |        |        |                                |        |        |                                 |                                                |          |            |
| <80                               | 0.19                        | 0.16  | 0.18  | 35,703                                          | 34,728 | 70,431 | 6,846                          | 5,711  | 12,557 | £19,603                         | £134,205                                       | £111,951 | £246,157   |
| 80-84                             | 5.72                        | 3.55  | 4.44  | 1,450                                           | 1,722  | 3,172  | 8,295                          | 6,108  | 14,403 | £24,345                         | £201,954                                       | £148,692 | £350,646   |
| 85-89                             | 6.49                        | 6.71  | 6.64  | 1,124                                           | 1,428  | 2,552  | 7,299                          | 9,589  | 16,888 | £24,345                         | £177,704                                       | £233,434 | £411,138   |
| ≥90                               | 7.50                        | 12.73 | 11.31 | 1,065                                           | 1,519  | 2,584  | 7,987                          | 19,343 | 27,330 | £24,345                         | £194,436                                       | £470,909 | £665,346   |
| Total                             | 0.36                        | 0.47  | 0.41  | 39,343                                          | 39,398 | 78,741 | 30,428                         | 40,750 | 71,178 |                                 | £708,299                                       | £964,987 | £1,673,286 |
| <80                               |                             |       |       |                                                 |        | 70,431 |                                |        | 12,557 |                                 |                                                |          | £246,157   |
| ≥80                               |                             |       |       |                                                 |        | 8,309  |                                |        | 58,621 |                                 |                                                |          | £1,427,129 |
| <b>AF-related systemic emboli</b> |                             |       |       |                                                 |        |        |                                |        |        |                                 |                                                |          |            |
| <80                               | 0.02                        | 0.03  | 0.03  | 35,703                                          | 34,728 | 70,431 | 856                            | 965    | 1,821  | £13,969                         | £11,954                                        | £13,483  | £25,438    |
| 80-84                             | 0.73                        | 0.59  | 0.65  | 1,450                                           | 1,722  | 3,172  | 1,059                          | 1,018  | 2,077  | £13,606                         | £14,403                                        | £13,854  | £28,256    |
| 85-89                             | 1.30                        | 1.78  | 1.61  | 1,124                                           | 1,428  | 2,552  | 1,460                          | 2,544  | 4,004  | £13,606                         | £19,863                                        | £34,608  | £54,472    |
| ≥90                               | 3.40                        | 3.05  | 3.15  | 1,065                                           | 1,519  | 2,584  | 3,630                          | 4,642  | 8,273  | £13,606                         | £49,390                                        | £63,159  | £112,549   |
| Total                             | 0.06                        | 0.10  | 0.08  | 39,343                                          | 39,398 | 78,741 | 7,005                          | 9,169  | 16,174 |                                 | £95,610                                        | £125,105 | £220,715   |
| <80                               |                             |       |       |                                                 |        | 70,431 |                                |        | 1,821  |                                 |                                                |          | £25,438    |
| ≥80                               |                             |       |       |                                                 |        | 8,309  |                                |        | 14,353 |                                 |                                                |          | £195,277   |

**Tables XVIA-G: Numbers used in calculation of extrapolations from OXVASC to current and future event numbers in the UK population**

XVIA: UK population projections (in 1000s) by Office for National Statistics (UK)\* for 1981-86, 2010, 2030 and 2050 by mid-point 10-year age bands

| Age          | 1981-1986 averaged |              |              | 2010         |              |              | 2030         |              |              | 2050         |              |              |
|--------------|--------------------|--------------|--------------|--------------|--------------|--------------|--------------|--------------|--------------|--------------|--------------|--------------|
|              | Men                | Women        | Total        | Men          | Women        | Total        | Men          | Women        | Total        | Men          | Women        | Total        |
| <35          | 14399              | 13910        | 28309        | 13918        | 13316        | 27235        | 15114        | 14450        | 29565        | 16089        | 15379        | 31468        |
| 35-44        | 3637               | 3606         | 7242         | 4378         | 4456         | 8834         | 4960         | 4671         | 9631         | 5149         | 4908         | 10056        |
| 45-54        | 3099               | 3112         | 6211         | 4215         | 4332         | 8547         | 4164         | 4109         | 8273         | 4494         | 4346         | 8840         |
| 55-64        | 2963               | 3204         | 6168         | 3599         | 3743         | 7342         | 4100         | 4308         | 8408         | 4689         | 4542         | 9230         |
| 65-74        | 2235               | 2872         | 5107         | 2572         | 2827         | 5399         | 3579         | 3886         | 7465         | 3762         | 3849         | 7611         |
| 75-84        | 991                | 1833         | 2824         | 1501         | 1993         | 3494         | 2431         | 2860         | 5291         | 2971         | 3428         | 6399         |
| ≥85          | 154                | 506          | 660          | 460          | 951          | 1411         | 1131         | 1628         | 2759         | 2190         | 2947         | 5137         |
| <b>Total</b> | <b>27477</b>       | <b>29044</b> | <b>56521</b> | <b>30643</b> | <b>31619</b> | <b>62262</b> | <b>35480</b> | <b>35912</b> | <b>71392</b> | <b>39343</b> | <b>39398</b> | <b>78741</b> |

\*<http://www.statistics.gov.uk/hub/population/index.html>. Assessed 18<sup>th</sup> Nov 2012.

XVIB: UK population projections (in 1000s) by the Office for National Statistics (UK)\* for 2010, 2030 and 2050 by 5-year age bands

| Age   | 2010  |       |       | 2030  |       |       | 2050  |       |       |
|-------|-------|-------|-------|-------|-------|-------|-------|-------|-------|
|       | Men   | Women | Total | Men   | Women | Total | Men   | Women | Total |
| 0- 4  | 1977  | 1881  | 3858  | 2043  | 1945  | 3988  | 2251  | 2143  | 4394  |
| 5- 9  | 1762  | 1685  | 3446  | 2096  | 2001  | 4097  | 2226  | 2125  | 4352  |
| 10-14 | 1825  | 1742  | 3567  | 2144  | 2051  | 4195  | 2152  | 2058  | 4210  |
| 15-19 | 2013  | 1899  | 3912  | 2176  | 2084  | 4259  | 2108  | 2018  | 4126  |
| 20-24 | 2213  | 2097  | 4310  | 2196  | 2118  | 4314  | 2258  | 2177  | 4436  |
| 25-29 | 2169  | 2081  | 4250  | 2161  | 2074  | 4235  | 2484  | 2379  | 4863  |
| 30-34 | 1960  | 1932  | 3891  | 2299  | 2178  | 4477  | 2610  | 2478  | 5088  |
| 35-39 | 2085  | 2117  | 4202  | 2470  | 2325  | 4794  | 2644  | 2515  | 5159  |
| 40-44 | 2293  | 2339  | 4632  | 2490  | 2347  | 4837  | 2505  | 2392  | 4897  |
| 45-49 | 2250  | 2316  | 4566  | 2233  | 2163  | 4396  | 2261  | 2182  | 4443  |
| 50-54 | 1965  | 2016  | 3981  | 1930  | 1946  | 3877  | 2233  | 2164  | 4397  |
| 55-59 | 1759  | 1820  | 3578  | 1990  | 2076  | 4066  | 2335  | 2257  | 4592  |
| 60-64 | 1840  | 1924  | 3764  | 2110  | 2233  | 4343  | 2353  | 2285  | 4638  |
| 65-69 | 1412  | 1520  | 2932  | 1977  | 2126  | 4104  | 2069  | 2058  | 4126  |
| 70-74 | 1160  | 1307  | 2468  | 1601  | 1760  | 3361  | 1693  | 1791  | 3484  |
| 75-79 | 894   | 1108  | 2002  | 1286  | 1477  | 2763  | 1521  | 1706  | 3226  |
| 80-84 | 607   | 886   | 1493  | 1145  | 1383  | 2529  | 1450  | 1722  | 3172  |
| 85-89 | 326   | 608   | 935   | 660   | 883   | 1542  | 1124  | 1428  | 2552  |
| 90-94 | 110   | 255   | 365   | 333   | 502   | 835   | 648   | 890   | 1538  |
| 95-99 | 22    | 76    | 98    | 117   | 197   | 313   | 292   | 428   | 720   |
| ≥100  | 2     | 11    | 13    | 22    | 46    | 68    | 126   | 201   | 327   |
| Total | 30643 | 31619 | 62262 | 35480 | 35912 | 71392 | 39343 | 39398 | 78741 |

\*<http://www.statistics.gov.uk/hub/population/index.html>. Assessed 3<sup>rd</sup> Nov 2012

XVIC: Estimated number of patients with AF-related incident ischaemic stroke based on extrapolation of age/sex-specific rates in OCSF to UK population in 1981-86

| OCSP 1981-86 | Total number/<br>number at risk | Rate/100,000/year (95% CI) |        |        | UK Population Projections 1981-86 (in 1000s) |       |       | Estimated numbers (in 1000s) |            |       |
|--------------|---------------------------------|----------------------------|--------|--------|----------------------------------------------|-------|-------|------------------------------|------------|-------|
|              |                                 | Men                        | Women  | Total  | Men                                          | Women | Total | Men                          | Women      | Total |
| Age          |                                 |                            |        |        |                                              |       |       |                              |            |       |
| <80          | 51/84361                        | 15.65                      | 14.56  | 15.11  | 26996                                        | 27812 | 54809 | 4224                         | 4049       | 8272  |
| 80-84        | 17/1187                         | 436.55                     | 318.01 | 358.04 | 327                                          | 725   | 1052  | 1427                         | 2307       | 3734  |
| ≥85          | 17/969                          | 534.19                     | 408.16 | 438.60 | 154                                          | 506   | 660   | 820                          | 2066       | 2887  |
| Total        | 85/86517                        | 22.27                      | 26.91  | 24.56  | 27477                                        | 29044 | 56521 | 6471                         | 8422       | 14893 |
|              |                                 |                            |        |        |                                              |       |       |                              | Age ≥80:   | 6621  |
|              |                                 |                            |        |        |                                              |       |       |                              | % Age ≥80: | 44.5  |

XVID: Estimated number of patients with AF-related events based on extrapolation of age/sex-specific rates in OXVASC to UK population in 2010

| Age                     | Total number/<br>number at<br>risk | Rate/100,000/year (95% CI) |         |         | UK Population Projections 2010<br>(in 1000s) |       |       | Numbers<br>(in 1000s) |       |       |
|-------------------------|------------------------------------|----------------------------|---------|---------|----------------------------------------------|-------|-------|-----------------------|-------|-------|
|                         |                                    | Men                        | Women   | Total   | Men                                          | Women | Total | Men                   | Women | Total |
| <b>Ischaemic stroke</b> |                                    |                            |         |         |                                              |       |       |                       |       |       |
| <80                     | 159/89068                          | 19.18                      | 16.44   | 17.85   | 29576                                        | 29782 | 59359 | 5671                  | 4898  | 10569 |
| 80-84                   | 89/2006                            | 572.02                     | 354.64  | 443.68  | 607                                          | 886   | 1493  | 3473                  | 3140  | 6613  |
| 85-89                   | 74/1115                            | 649.35                     | 671.31  | 663.72  | 326                                          | 608   | 935   | 2117                  | 4085  | 6202  |
| ≥90                     | 61/539                             | 749.59                     | 1273.46 | 1130.93 | 134                                          | 342   | 476   | 1003                  | 4358  | 5361  |
| Total                   | 383/92728                          | 36.19                      | 46.61   | 41.30   | 30643                                        | 31619 | 62262 | 12265                 | 16481 | 28745 |
| <b>Systemic emboli</b>  |                                    |                            |         |         |                                              |       |       |                       |       |       |
| <80                     | 23/89068                           | 2.40                       | 2.78    | 2.58    | 29576                                        | 29782 | 59359 | 709                   | 828   | 1537  |
| 80-84                   | 13/2006                            | 73.02                      | 59.11   | 64.81   | 607                                          | 886   | 1493  | 443                   | 523   | 967   |
| 85-89                   | 18/1115                            | 129.87                     | 178.10  | 161.45  | 326                                          | 608   | 935   | 423                   | 1084  | 1507  |
| ≥90                     | 17/539                             | 340.72                     | 305.63  | 315.18  | 134                                          | 342   | 476   | 456                   | 1046  | 1502  |
| Total                   | 71/92728                           | 5.71                       | 9.67    | 7.66    | 30643                                        | 31619 | 62262 | 2032                  | 3481  | 5513  |
| <b>All events</b>       |                                    |                            |         |         |                                              |       |       |                       |       |       |
| <80                     | 182/89068                          | 21.57                      | 19.22   | 20.43   | 29576                                        | 29782 | 59359 | 6380                  | 5725  | 12106 |
| 80-84                   | 102/2006                           | 645.04                     | 413.75  | 508.49  | 607                                          | 886   | 1493  | 3916                  | 3664  | 7580  |
| 85-89                   | 92/1115                            | 779.22                     | 849.41  | 825.17  | 326                                          | 608   | 935   | 2541                  | 5168  | 7709  |
| ≥90                     | 78/539                             | 1090.31                    | 1579.09 | 1446.11 | 134                                          | 342   | 476   | 1459                  | 5404  | 6863  |
| Total                   | 454/92728                          | 41.91                      | 56.29   | 48.96   | 30643                                        | 31619 | 62262 | 14297                 | 19961 | 34258 |

XVIE: Increment in age-specific incidence rates between OXVASC and OCSP over 25 years

| Age (yr)      | Number in<br>10 years | Number at<br>risk per year | Rate/1000 | Relative rate<br>(OXVASC/OCSP) |                        |                      |                      |
|---------------|-----------------------|----------------------------|-----------|--------------------------------|------------------------|----------------------|----------------------|
|               |                       |                            |           | Increase over<br>25yr          | % increase per<br>10yr | "Factor" for<br>20yr | "Factor" for<br>40yr |
| <b>OXVASC</b> |                       |                            |           |                                |                        |                      |                      |
| <80           | 159                   | 89068                      | 0.178516  | 1.181158                       | 7.246336               | <b>1.144927</b>      | <b>1.289853</b>      |
| ≥80           | 224                   | 3660                       | 6.119801  | 1.552275                       | 22.09099               | <b>1.44182</b>       | <b>1.88364</b>       |
| Total         | 383                   | 92728                      | 0.413036  | 1.68163                        |                        |                      |                      |
| <b>OCSP</b>   |                       |                            |           |                                |                        |                      |                      |
| <80           | 51                    | 84361                      | 0.151136  |                                |                        |                      |                      |
| ≥80           | 34                    | 2156                       | 3.942473  |                                |                        |                      |                      |
| Total         | 85                    | 86517                      | 0.245616  |                                |                        |                      |                      |

XVIF: Estimated number of patients with AF-related events based on extrapolation of age/sex-specific rates in OXVASC to UK population in 2030

| Ischaemic stroke       | Rate/100,000/year (95% CI) |         |         | UK Population Projections 2030 (in 1000s) |       |       | Estimated numbers: no rate increase (in 1000s) |       |       |
|------------------------|----------------------------|---------|---------|-------------------------------------------|-------|-------|------------------------------------------------|-------|-------|
|                        | Men                        | Women   | Total   | Men                                       | Women | Total | Men                                            | Women | Total |
| Age                    |                            |         |         |                                           |       |       |                                                |       |       |
| <80                    | 19.18                      | 16.44   | 17.85   | 33203                                     | 32901 | 66104 | 6367                                           | 5410  | 11777 |
| 80-84                  | 572.02                     | 354.64  | 443.68  | 1145                                      | 1383  | 2529  | 6552                                           | 4905  | 11457 |
| 85-89                  | 649.35                     | 671.31  | 663.72  | 660                                       | 883   | 1542  | 4283                                           | 5926  | 10209 |
| ≥90                    | 749.59                     | 1273.46 | 1130.93 | 472                                       | 745   | 1217  | 3538                                           | 9490  | 13028 |
| Total                  | 36.19                      | 46.61   | 41.30   | 35480                                     | 35912 | 71392 | 20739                                          | 25732 | 46471 |
| <b>Systemic emboli</b> |                            |         |         |                                           |       |       |                                                |       |       |
| <80                    | 2.40                       | 2.78    | 2.58    | 33203                                     | 32901 | 66104 | 796                                            | 914   | 1710  |
| 80-84                  | 73.02                      | 59.11   | 64.81   | 1145                                      | 1383  | 2529  | 836                                            | 818   | 1654  |
| 85-89                  | 129.87                     | 178.10  | 161.45  | 660                                       | 883   | 1542  | 857                                            | 1572  | 2429  |
| ≥90                    | 340.72                     | 305.63  | 315.18  | 472                                       | 745   | 1217  | 1608                                           | 2278  | 3886  |
| Total                  | 5.71                       | 9.67    | 7.66    | 35480                                     | 35912 | 71392 | 4097                                           | 5582  | 9679  |
| <b>All events</b>      |                            |         |         |                                           |       |       |                                                |       |       |
| <80                    | 21.57                      | 19.22   | 20.43   | 33203                                     | 32901 | 66104 | 7163                                           | 6325  | 13487 |
| 80-84                  | 645.04                     | 413.75  | 508.49  | 1145                                      | 1383  | 2529  | 7388                                           | 5723  | 13111 |
| 85-89                  | 779.22                     | 849.41  | 825.17  | 660                                       | 883   | 1542  | 5139                                           | 7498  | 12637 |
| ≥90                    | 1090.31                    | 1579.09 | 1446.11 | 472                                       | 745   | 1217  | 5146                                           | 11768 | 16914 |
| Total                  | 41.91                      | 56.29   | 48.96   | 35480                                     | 35912 | 71392 | 24836                                          | 31314 | 56150 |

XVIG: Estimated number of patients with incident AF-related events based on extrapolation of rates in OXVASC to UK population in 2050

| Ischaemic stroke       | Rate/100,000/year (95% CI) |         |         | UK Population Projections 2050 (in 1000s) |       |       | Estimated numbers: no rate increase (in 1000s) |       |       |
|------------------------|----------------------------|---------|---------|-------------------------------------------|-------|-------|------------------------------------------------|-------|-------|
|                        | Men                        | Women   | Total   | Men                                       | Women | Total | Men                                            | Women | Total |
| Age                    |                            |         |         |                                           |       |       |                                                |       |       |
| <80                    | 19.18                      | 16.44   | 17.85   | 35703                                     | 34728 | 70431 | 6846                                           | 5711  | 12557 |
| 80-84                  | 572.02                     | 354.64  | 443.68  | 1450                                      | 1722  | 3172  | 8295                                           | 6108  | 14403 |
| 85-89                  | 649.35                     | 671.31  | 663.72  | 1124                                      | 1428  | 2552  | 7299                                           | 9589  | 16888 |
| ≥90                    | 749.59                     | 1273.46 | 1130.93 | 1065                                      | 1519  | 2584  | 7987                                           | 19343 | 27330 |
| Total                  | 36.19                      | 46.61   | 41.30   | 39343                                     | 39398 | 78741 | 30428                                          | 40750 | 71178 |
| <b>Systemic emboli</b> |                            |         |         |                                           |       |       |                                                |       |       |
| <80                    | 2.40                       | 2.78    | 2.58    | 35703                                     | 34728 | 70431 | 856                                            | 965   | 1821  |
| 80-84                  | 73.02                      | 59.11   | 64.81   | 1450                                      | 1722  | 3172  | 1059                                           | 1018  | 2077  |
| 85-89                  | 129.87                     | 178.10  | 161.45  | 1124                                      | 1428  | 2552  | 1460                                           | 2544  | 4004  |
| ≥90                    | 340.72                     | 305.63  | 315.18  | 1065                                      | 1519  | 2584  | 3630                                           | 4642  | 8273  |
| Total                  | 5.71                       | 9.67    | 7.66    | 39343                                     | 39398 | 78741 | 7005                                           | 9169  | 16174 |
| <b>All events</b>      |                            |         |         |                                           |       |       |                                                |       |       |
| <80                    | 21.57                      | 19.22   | 20.43   | 35703                                     | 34728 | 70431 | 7702                                           | 6676  | 14378 |
| 80-84                  | 645.04                     | 413.75  | 508.49  | 1450                                      | 1722  | 3172  | 9354                                           | 7126  | 16480 |
| 85-89                  | 779.22                     | 849.41  | 825.17  | 1124                                      | 1428  | 2552  | 8759                                           | 12132 | 20892 |
| ≥90                    | 1090.31                    | 1579.09 | 1446.11 | 1065                                      | 1519  | 2584  | 11617                                          | 23986 | 35603 |
| Total                  | 41.91                      | 56.29   | 48.96   | 39343                                     | 39398 | 78741 | 37433                                          | 49920 | 87353 |



Table XVII: Quality and Outcomes framework guidance on AF management from 2006-2013<sup>§</sup>

| Indicator                                                                                 | Points | 2006-7 | 2007-8 | 2008-9 | 2009-10*                                  | 2010-11*                                  | 2011-12*                                  | 2012-13*  | Payment stages |
|-------------------------------------------------------------------------------------------|--------|--------|--------|--------|-------------------------------------------|-------------------------------------------|-------------------------------------------|-----------|----------------|
| AF register (2006-2013)                                                                   | 5      | Yes    | Yes    | Yes    | Yes                                       | Yes                                       | Yes                                       | Yes       |                |
| AF diagnosis (2006-12)                                                                    | 10     | Yes    | Yes    | Yes    | Yes                                       | Yes                                       | Yes                                       | --        | 40-90%         |
| OAC or antiplatelet agents (2006-12)                                                      | 15     | Yes    | Yes    | Yes    | <b>points</b><br>↓from 15<br><b>to 12</b> | <b>points</b><br>↓from 15<br><b>to 12</b> | <b>points</b><br>↓from 15<br><b>to 12</b> | see below | 40-90%         |
| Use of CHADS <sub>2</sub> in preceding 15 months (2012-13)                                | 10     | --     | --     | --     | --                                        | --                                        | --                                        | Yes       | 40-90%         |
| CHADS <sub>2</sub> score =1 in preceding 15 months + use of OAC or antiplatelet (2012-13) | 6      | --     | --     | --     | --                                        | --                                        | --                                        | Yes       | 50-90%         |
| CHADS <sub>2</sub> ≥2 and treated with OAC (2012-13)                                      | 6      | --     | --     | --     | --                                        | --                                        | --                                        | Yes       | 40-70%         |

<sup>§</sup><http://www.qof.ic.nhs.uk>. Accessed December 10<sup>th</sup> 2012.

\*Maximum QOF points for AF reduced from 30 in 2006-2009 to 27 in 2009-2013.

**Table XVIII: Mean institutional costs incurred by patients with ischaemic event and known prior AF according to premorbid anticoagulation in first 5 years of OXVASC**

|                                                          | <b>Mean cost (SD)</b> |
|----------------------------------------------------------|-----------------------|
| <b>Patients with ischaemic stroke and known prior AF</b> |                       |
| On warfarin (n=17)                                       | £26,734 (S.D. 48,202) |
| Not on warfarin (n=109)                                  | £22,816 (S.D. 44,058) |
| <b>Patients with systemic emboli and known prior AF</b>  |                       |
| On warfarin (n=7)                                        | £17,486 (S.D. 23,011) |
| Not on warfarin (n=24)                                   | £12,511 (S.D. 22,003) |

**Table XIX: 6-month functional outcome in patients with ischaemic event and known prior AF according to pre-morbid anticoagulation in OXVASC**

|                                            | No warfarin (%) | Warfarin (%) | P value |
|--------------------------------------------|-----------------|--------------|---------|
| <b>Ischaemic stroke and known prior AF</b> |                 |              |         |
| mRS 0-2                                    | 63 (27.6)       | 17 (37.0)    |         |
| mRS 3-6                                    | 165 (72.4)      | 29 (63.0)    | 0.20    |
| Total                                      | 228 (100)       | 46 (100)     |         |
| <b>Systemic emboli and known prior AF</b>  |                 |              |         |
| mRS 0-2                                    | 8 (15.4)        | 1 (10)       |         |
| mRS 3-6                                    | 44 (84.6)       | 9 (90)       | 1.00    |
| Total                                      | 52 (100)        | 10 (100)     |         |

**Figure I: Premorbid antithrombotic therapy in the 336 OXVASC patients with incident AF-related ischaemic stroke or systemic embolism and known prior AF**

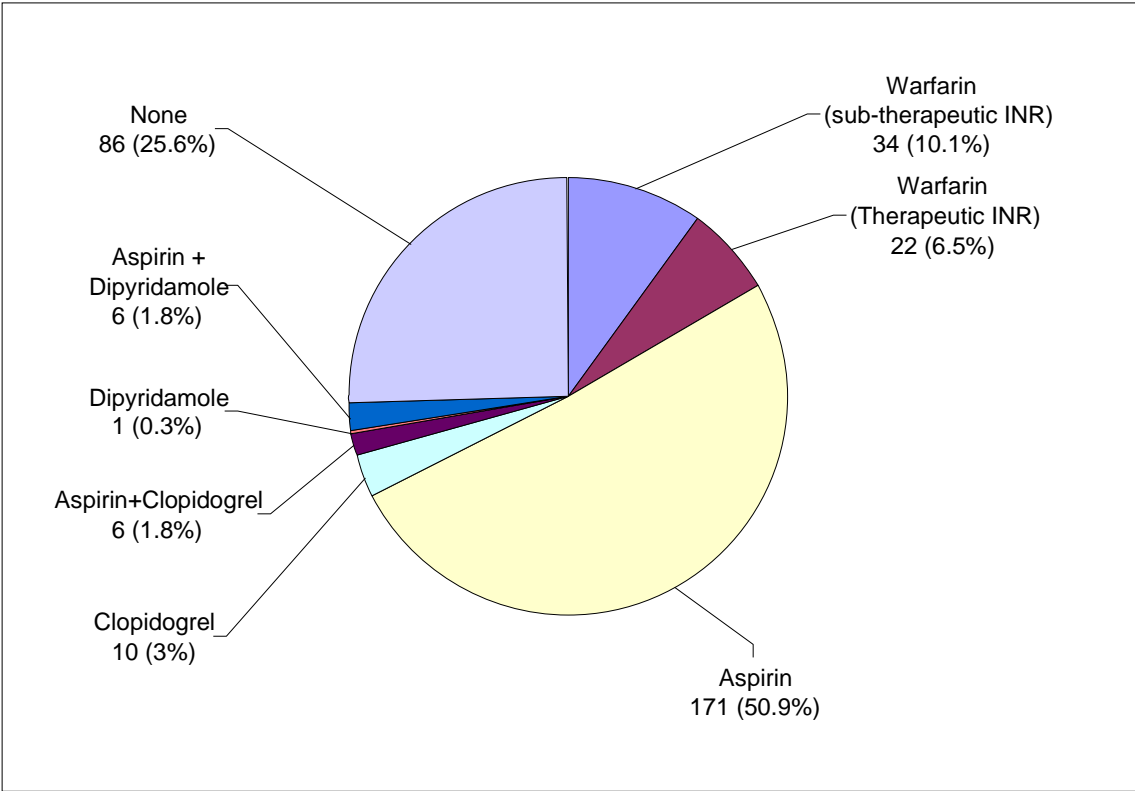

**Figures IIA-F: Premorbid warfarin use in OXVASC patients with known prior AF who had a fatal/disabling embolic event or were institutionalized at 6 months follow-up**

**IIA: Premorbid warfarin use in OXVASC patients at age  $\geq 80$  with known prior AF who had a fatal/disabling embolic event or were institutionalized at 6 months follow-up.** Total AF embolic events disabled/dead=230/449; Total AF embolic events institutionalized/dead=185/325

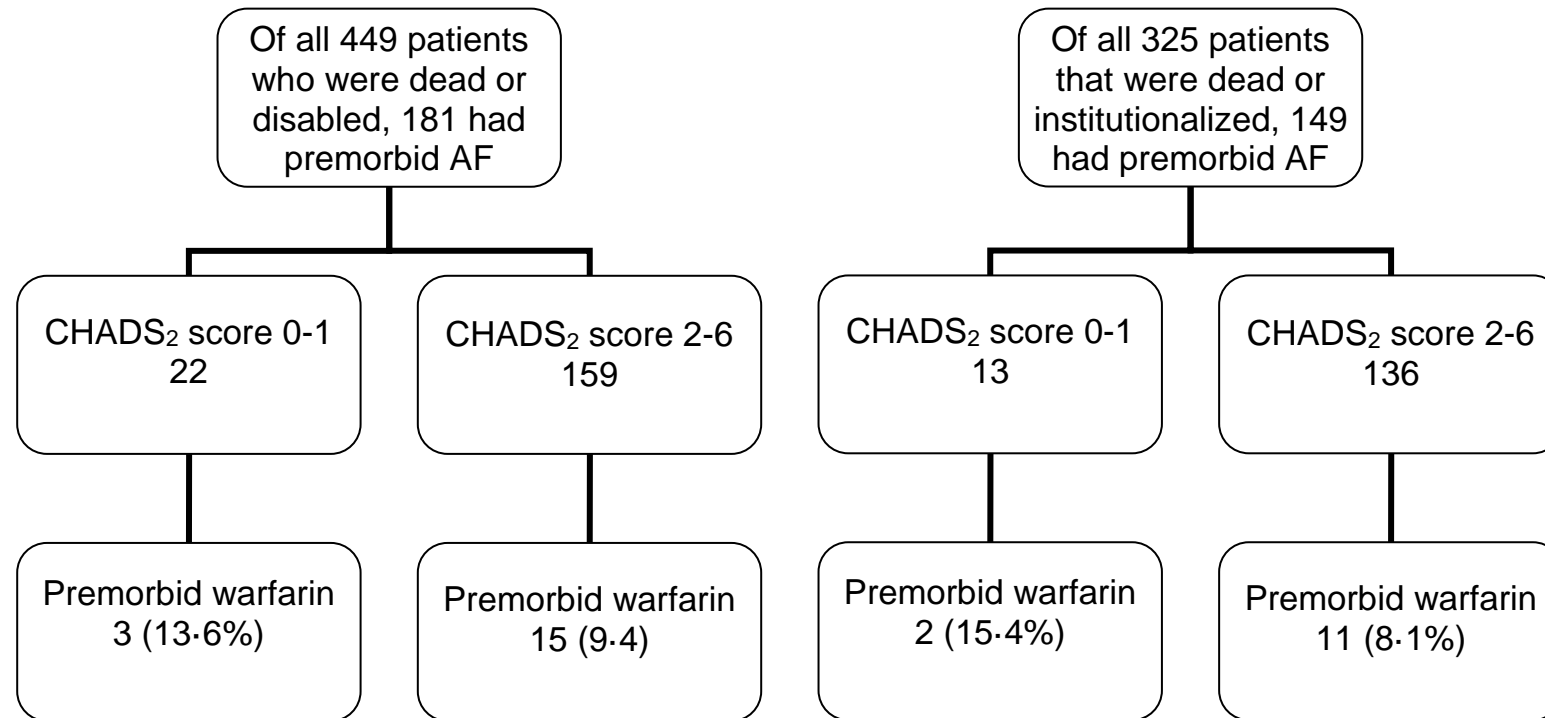

**IIB: Premorbid warfarin use in OXVASC patients with known prior AF who had a fatal/disabling embolic event or were institutionalized at 6 months follow-up.** Total AF embolic events disabled/dead=325/729; Total AF embolic events institutionalized/dead=240/471

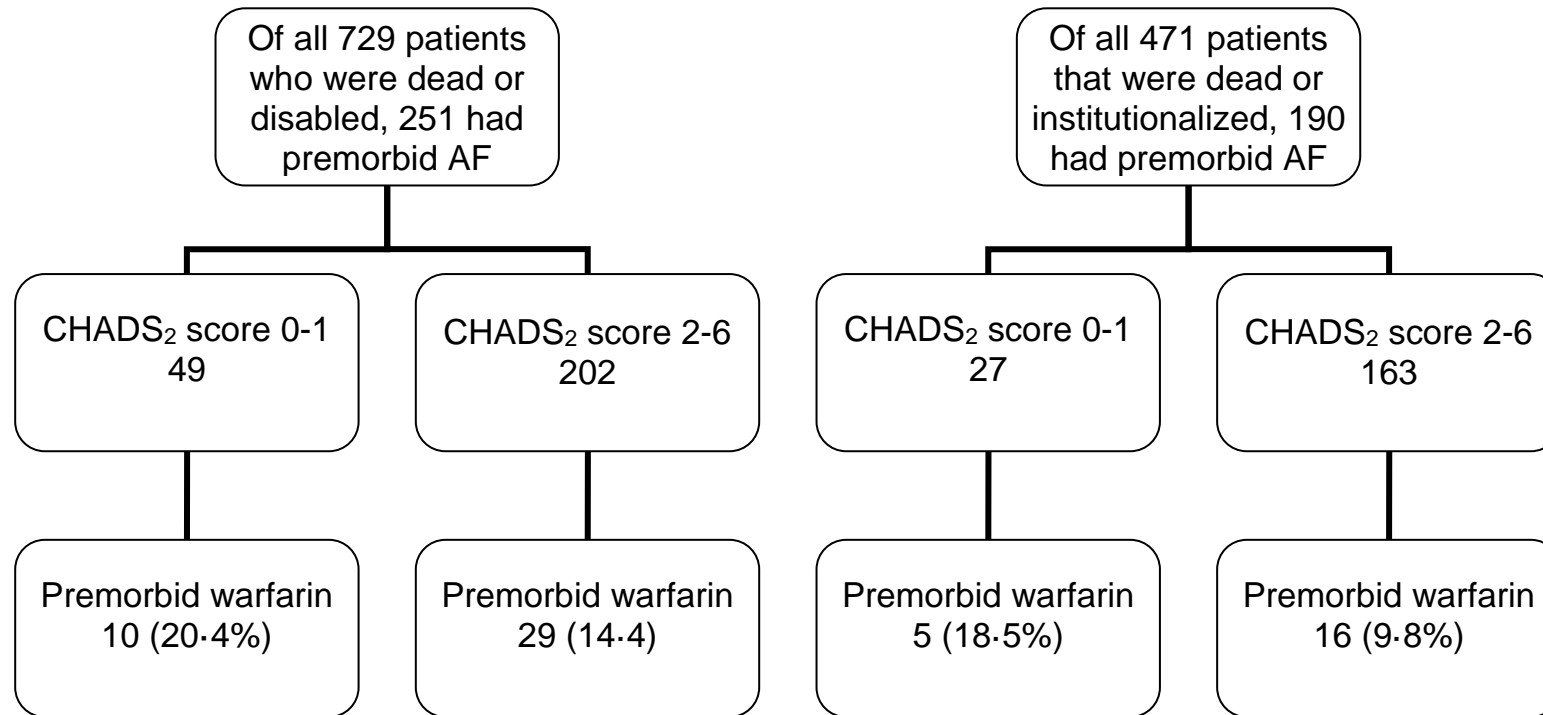

**IIC: Premorbid warfarin use in OXVASC patients at age ≥80 with known prior AF who had a fatal/disabling ischaemic stroke or were institutionalized at 6 months follow-up.** Total AFIS (AF-related incident ischaemic stroke) disabled/dead =183/369;  
Total AFIS institutionalized/dead =142/253

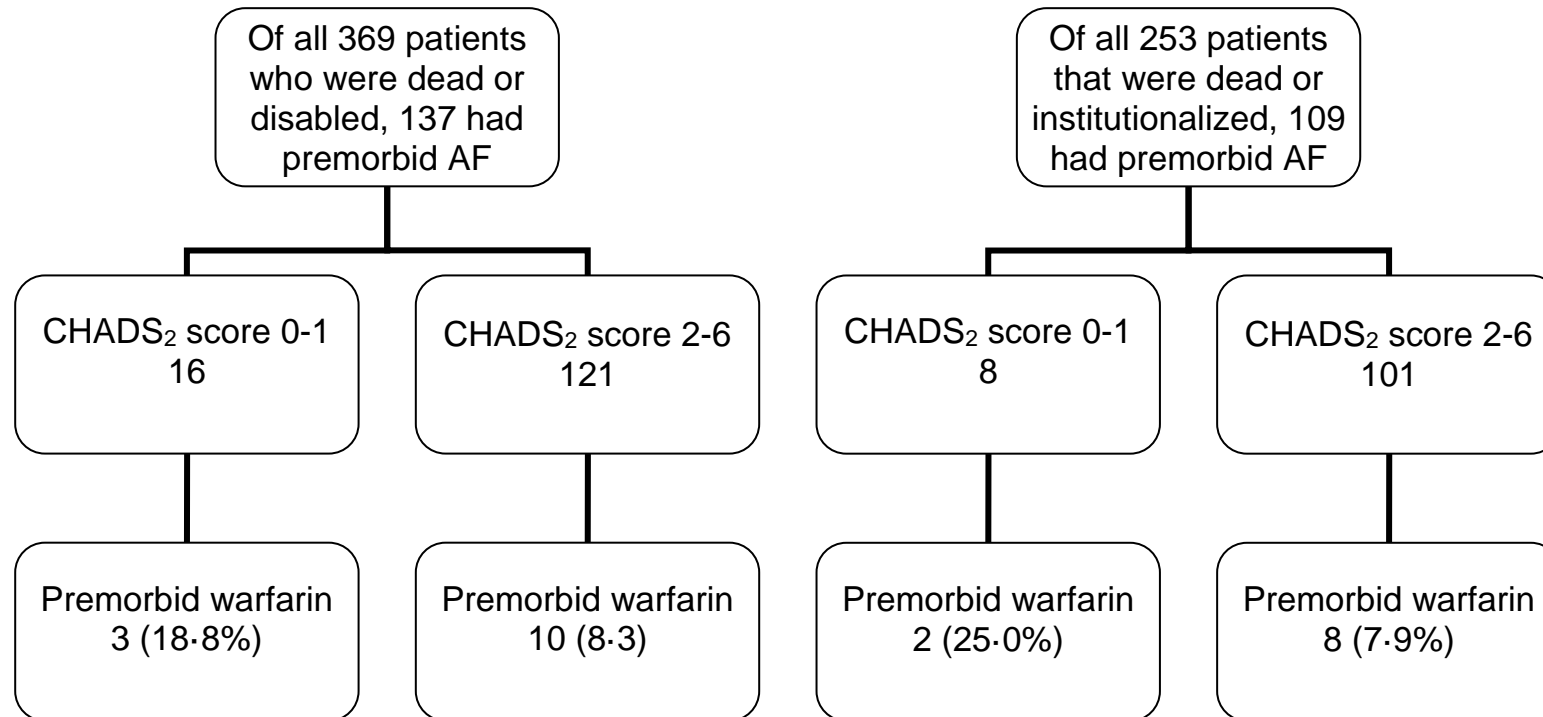

**IID: Premorbid warfarin use in OXVASC patients with known prior AF who had a fatal/disabling stroke or were institutionalized at 6 months follow-up.** Total AFIS disabled/death=262; Total AFIS institutionalized/dead=186

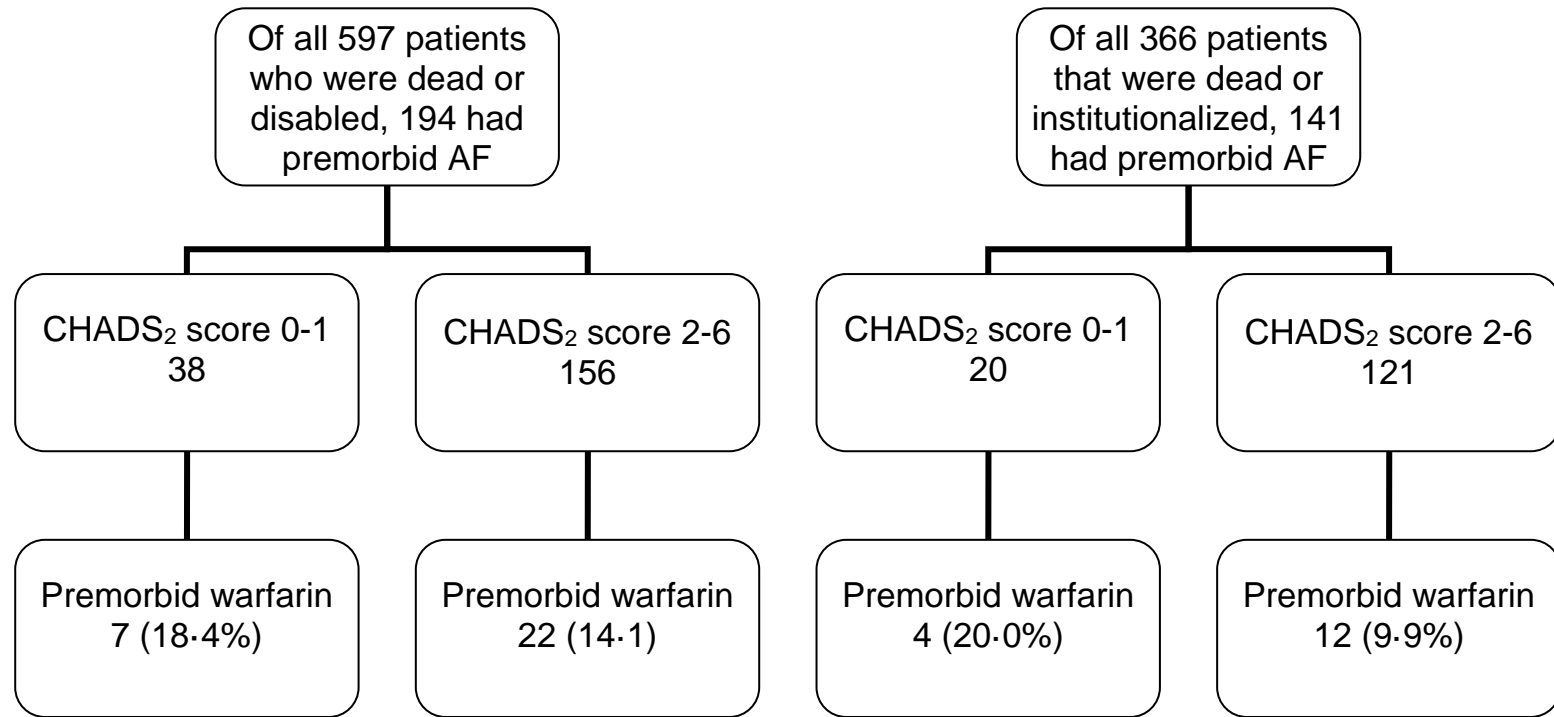



**IIE: Premorbid warfarin use in OXVASC patients at age  $\geq 80$  with known prior AF who had a fatal/disabling (6M mRS=3-6) systemic embolism or were institutionalized at 6 months follow-up.**

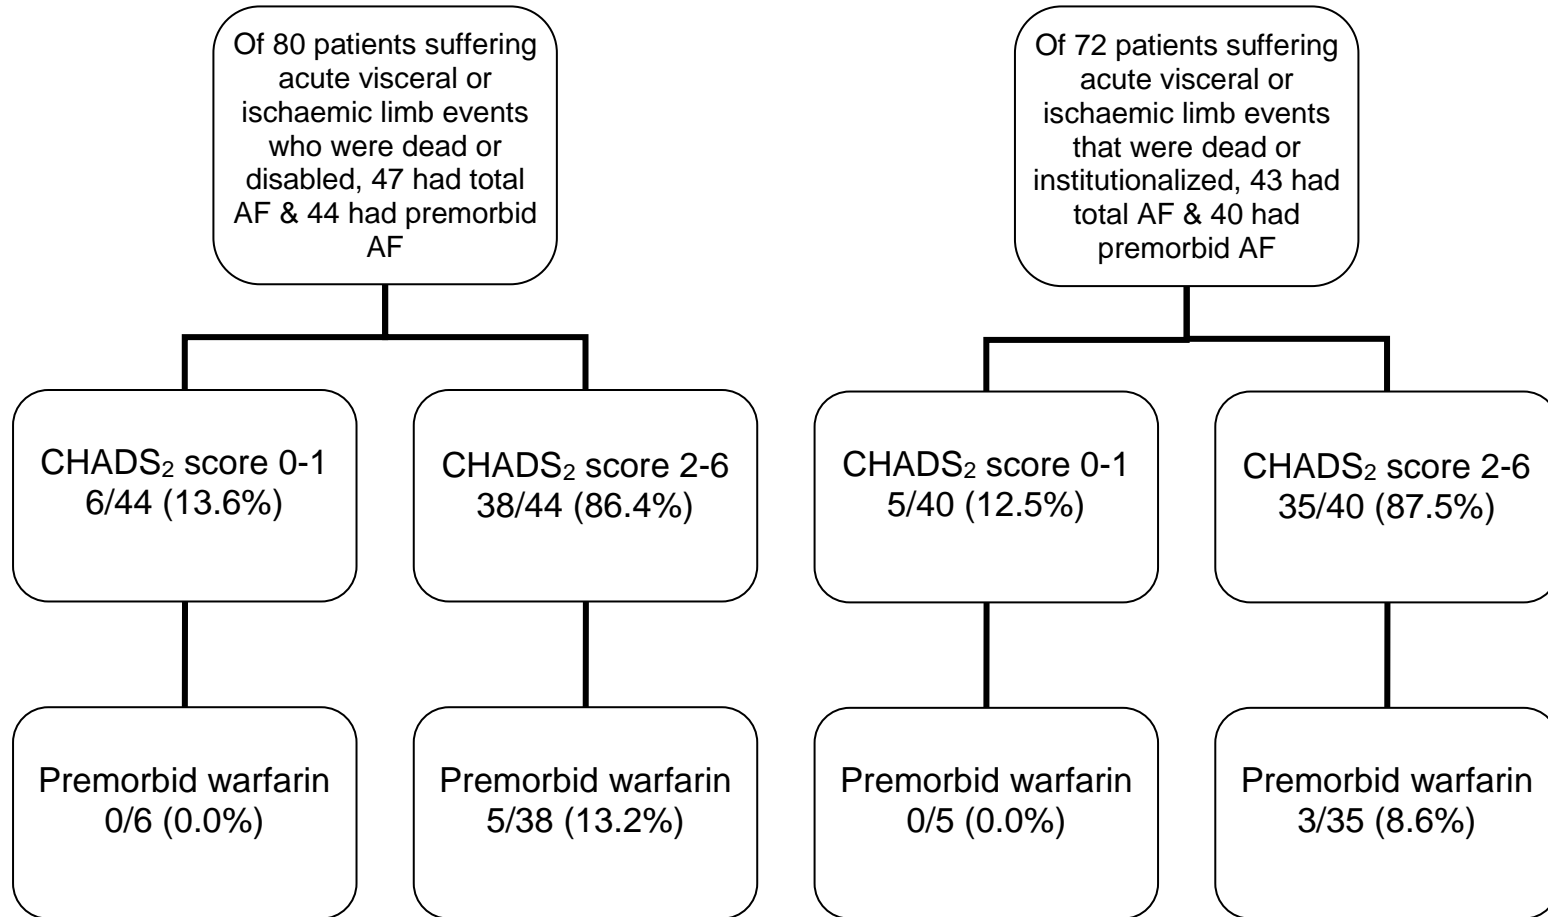

**IIF: Premorbid warfarin use in OXVASC patients with known prior AF who had a fatal/disabling (6M mRS=3-6) systemic embolism or were institutionalized at 6 months follow-up.**

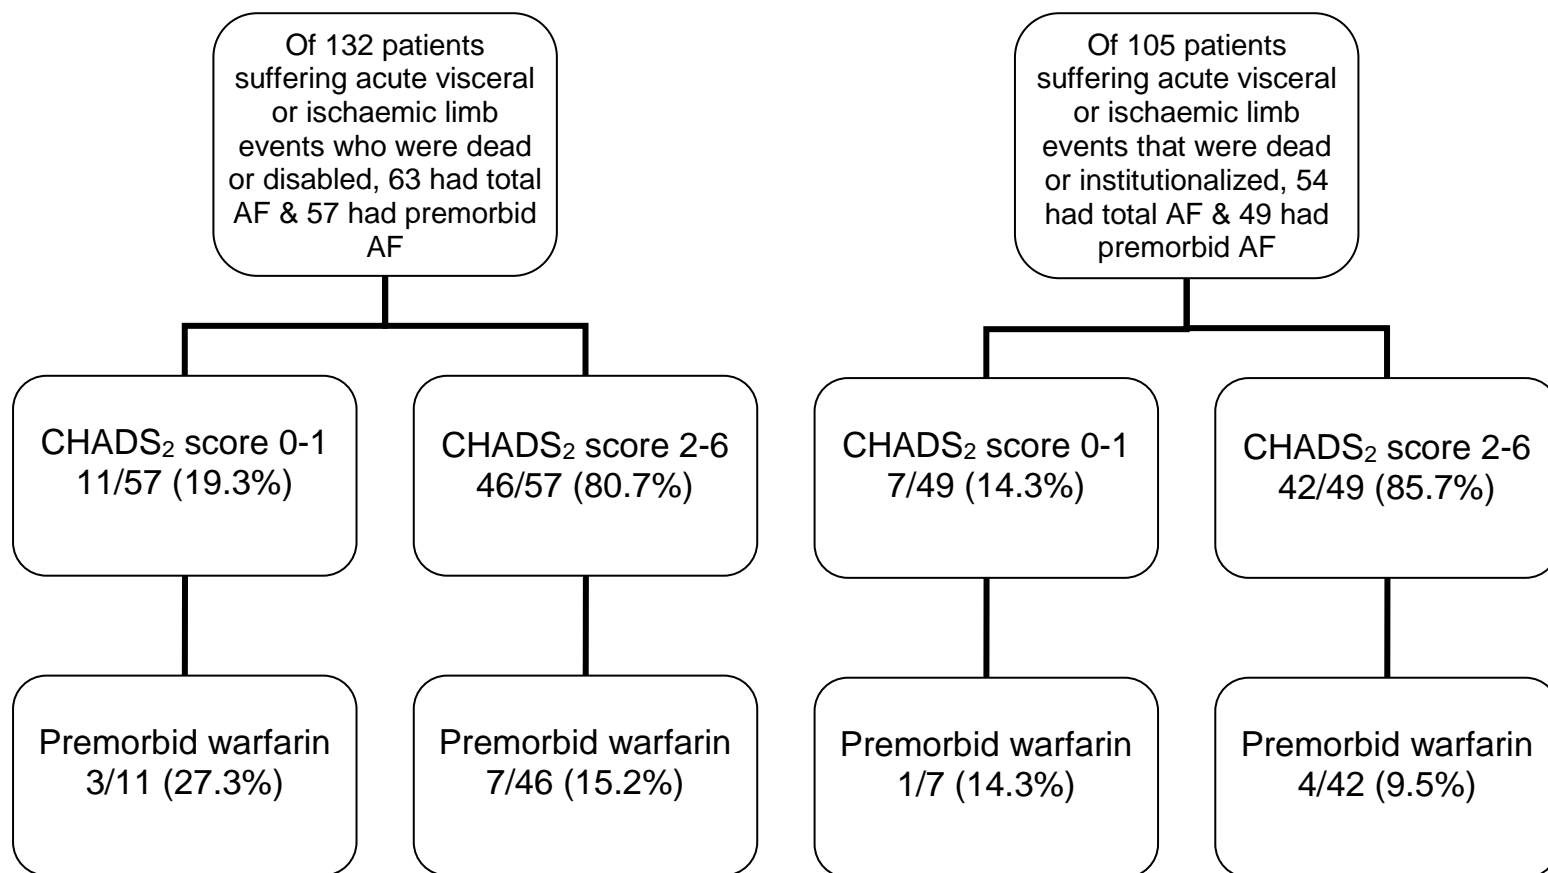

**Figure III: Premorbid antithrombotic agent use according to CHADS<sub>2</sub> score (n=336);** white bar=anticoagulation, gray bar=antiplatelet(s), black bar=no antithrombotic agent

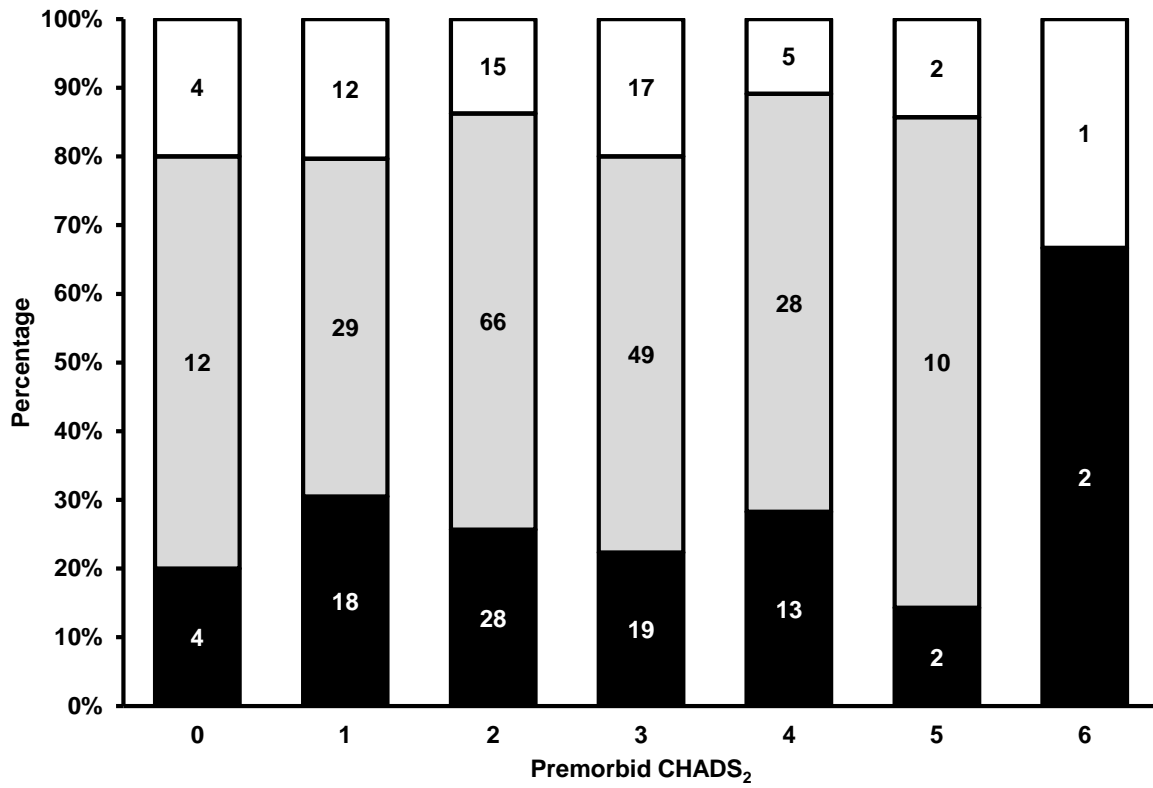

Figure IV: 5-year risk of institutionalization in a nursing or residential home care after AF-related incident stroke

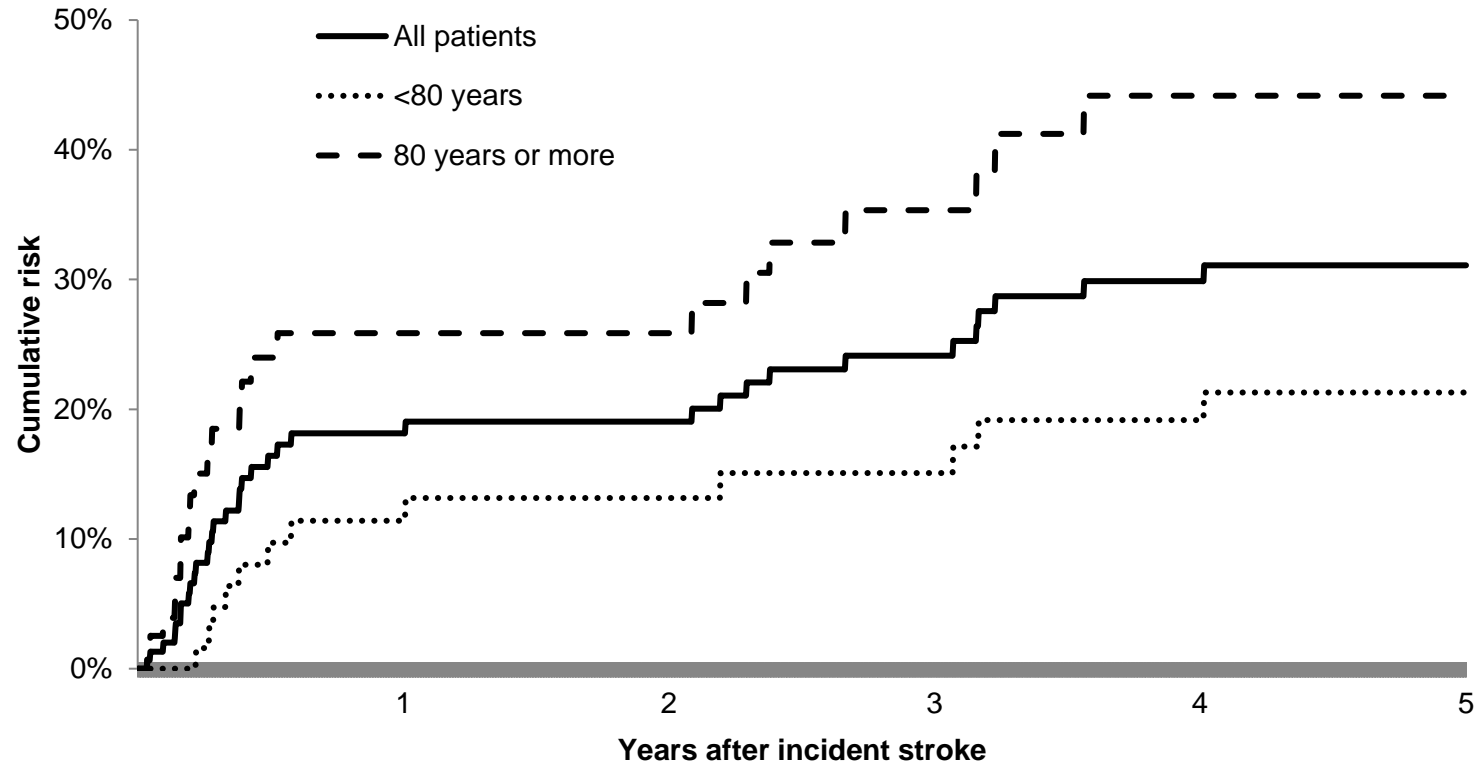

For our analysis, only the costs for patients institutionalized within 6 months of incident stroke were included in the analysis.

**Figure V: Rates of prior anticoagulation in patients with incident stroke or ischaemic stroke and known prior AF in OXVASC and other recent stroke incidence studies; OAC=oral anticoagulation; \*incident ischaemic stroke**

| Studies                       | OAC                |       | 95% CI    |
|-------------------------------|--------------------|-------|-----------|
|                               | Premorbid AF       | % OAC |           |
| 2001-5 Barbados               | 19 / 64            | 29.7  | 18.5-40.9 |
| 2002-3 Auckland, NZ           | 71 / 289           | 24.6  | 19.6-29.5 |
| 2000-6 Dijon, France*         | 30 / 139           | 21.6  | 14.7-28.4 |
| 2005-6 North Dublin*          | 16 / 62            | 25.8  | 14.9-36.7 |
| 2006-7 Ludwigshafen, Germany* | 42 / 121           | 34.7  | 26.2-43.2 |
| 2002-12 OXVASC, UK*           | 46 / 274           | 16.8  | 12.4-21.2 |
| TOTAL                         | 224 / 949          | 23.6  | 18.6-28.6 |
| Heterogeneity                 | <b>p= 0.004476</b> |       |           |

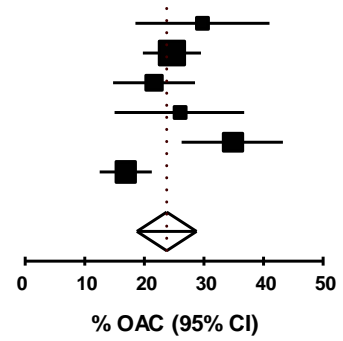

Supplement: NIHMS64705-supplement-Online-Only_Data_Supplement.pdf [file NIHMS64705-supplement-Online-Only_Data_Supplement.pdf]
